# Supplementary material for: Reactions of benzyltriphenylphosphonium salts under photoredox catalysis
Source: Royal Society of Chemistry journal article supplement (doi:10.1039/d1ob01570b), 2021-01-01
Supplement: d1ob01570b1.pdf [file d1ob01570b1.pdf]

*Supporting Information*

**Reactions of benzyltriphenylphosphonium salts under photoredox catalysis**

Andrew M. Boldt,<sup>‡a</sup> Sidney I. Dickinson,<sup>‡a</sup> Jonathan R. Ramirez,<sup>a</sup> Anna M. Benz-Weeden,<sup>a</sup> David S. Wilson,<sup>a</sup>  
and Susan M. Stevenson\*<sup>a</sup>

<sup>a</sup>*Department of Chemistry, Carthage College, Kenosha, WI 53140 USA*

\*E-mail: [sstevenson@carthage.edu](mailto:sstevenson@carthage.edu)

**Table of Contents**

|                                                                                             |     |
|---------------------------------------------------------------------------------------------|-----|
| <b>Materials and Methods</b> .....                                                          | S3  |
| <b>General procedure for reaction optimization experiments</b> .....                        | S4  |
| <b>General procedure for photoredox reactions of benzyltriphenylphosphonium salts</b> ..... | S5  |
| <b>TEMPO coupling experiment</b> .....                                                      | S11 |
| <b>HAT and deuterium incorporation experiments</b> .....                                    | S13 |
| <b>Reactions of benzyl bromides</b> .....                                                   | S16 |
| <b>1 mmol scale reaction</b> .....                                                          | S17 |
| <b>Representative procedure for synthesis of starting materials</b> .....                   | S18 |
| <b><sup>1</sup>H NMR spectra</b> .....                                                      | S20 |
| <b>References</b> .....                                                                     | S34 |

## Materials and Methods

Commercially available chemicals were purchased from Sigma-Aldrich (St. Louis, MO), Oakwood Chemical (Estill, SC), Combi-blocks (San Diego, CA), and TCI America (Portland, OR).  $[\text{Ir}(\text{dtbbpy})(\text{ppy})_2]\text{PF}_6$  was purchased from Oakwood Chemical,  $\text{Ir}(\text{ppy})_3$  and  $[\text{Ir}\{\text{dF}(\text{CF}_3)\text{ppy}\}_2(\text{dtbbpy})]\text{PF}_6$  were purchased from Sigma-Aldrich, and  $\text{Ru}(\text{bpy})_3(\text{PF}_6)_2$  was purchased from TCI America. All reagents and photocatalysts were used as received. Solvents were purchased from Sigma-Aldrich and used as received. Photoredox reactions were performed in borosilicate vials or borosilicate round-bottom flasks and irradiated with a Kessil A160WE Controllable LED Aquarium Light, Tuna Blue (450 nm). Qualitative TLC analysis was performed on 250  $\mu\text{m}$  thick, glass backed, F254 silica (Silicycle, Quebec City, Canada). Visualization was accomplished with UV light. Flash chromatography was performed using Silicycle silica gel (SiliaFlash P60, 230-400 mesh).  $^1\text{H}$  NMR spectra were acquired on a Bruker Ascend 400 MHz NMR Spectrometer and are reported relative to  $\text{SiMe}_4$  ( $\delta$  0.00).

## General procedure for reaction optimization experiments

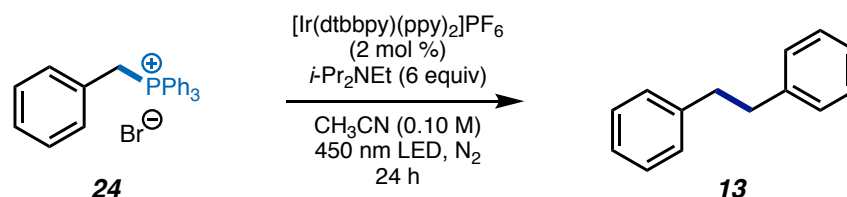

Table 1, entry 5:

To a 1-dram vial containing a stir bar were added benzyltriphenylphosphonium bromide (**24**) (43.3 mg, 0.100 mmol, 1 equiv),  $[\text{Ir}(\text{dtbbpy})(\text{ppy})_2]\text{PF}_6$  (1.8 mg, 2.00  $\mu\text{mol}$ , 2 mol %),  $i\text{-Pr}_2\text{NEt}$  (105  $\mu\text{L}$ , 0.600 mmol, 6 equiv), and  $\text{CH}_3\text{CN}$  (1.0 mL, 0.10 M). The vial was capped with an open-top screw cap fitted with a Teflon septum. The vial was degassed by bubbling  $\text{N}_2$  gas through the reaction mixture for 3 min. The vial was then placed on a stir plate, approximately 5 cm from the light source, and irradiated with a blue LED for 24 h with stirring. After 24 h, the reaction mixture was passed through a short plug of silica (~3 cm in a monster pipet), eluting with diethyl ether (~10 mL), then was concentrated by rotary evaporation. A solution containing 1 equiv of dibromomethane (17.4 mg, 0.100 mmol, 1 equiv) in  $\text{CDCl}_3$  was added and the crude reaction mixture was analyzed by  $^1\text{H}$  NMR spectroscopy to determine the NMR yield of **13**.

Picture of reaction set-up:

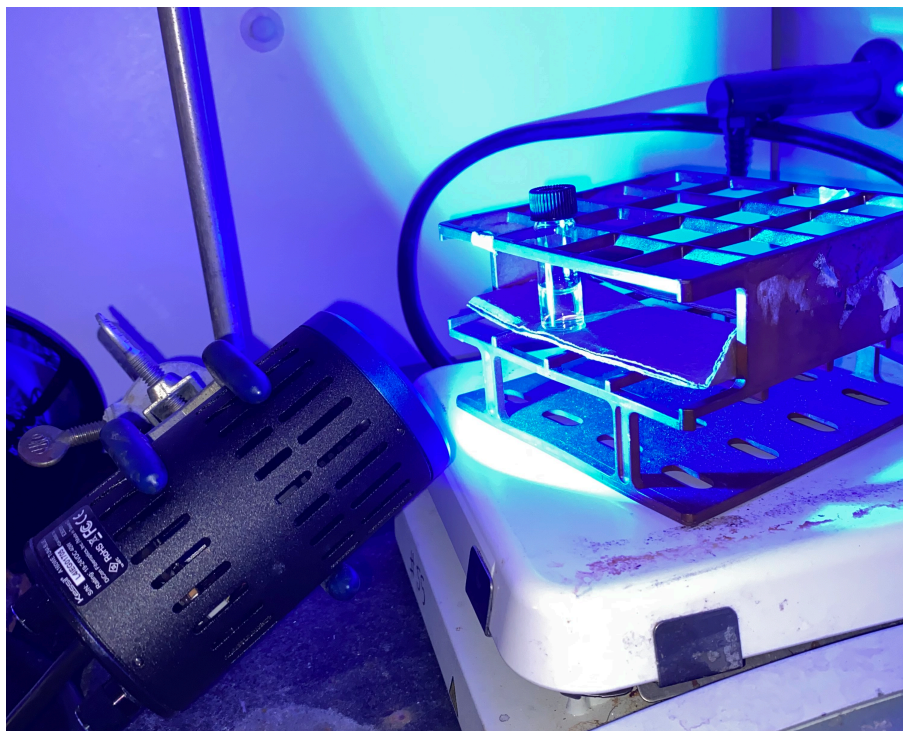



### General procedure for photoredox reactions of benzyltriphenylphosphonium salts

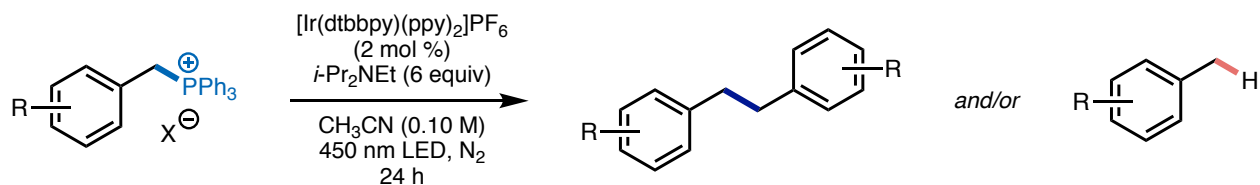

To a 25-mL round bottom flask containing a stir bar were added the benzyltriphenylphosphonium salt (0.250 mmol, 1 equiv), [Ir(dtbbpy)(ppy)<sub>2</sub>]PF<sub>6</sub> (4.6 mg, 5.00 μmol, 2 mol %), *i*-Pr<sub>2</sub>NEt (261 μL, 1.50 mmol, 6 equiv), and CH<sub>3</sub>CN (2.5 mL, 0.10 M). The vial was sealed with a rubber septum. The flask was degassed by bubbling N<sub>2</sub> gas through the reaction mixture for 3 min. The flask was then clamped over a stir plate, approximately 5 cm from the light source, and irradiated with a blue LED for 24 h with stirring. After 24 h, the reaction mixture was passed through a short plug of silica (~5 cm in a monster pipet), eluting with diethyl ether (~15 mL), then was concentrated by rotary evaporation.

To remove the triphenylphosphine byproduct from the crude reaction mixture, the procedure from Lipshutz was followed.<sup>1</sup> To the crude reaction mixture were added Merrifield's peptide resin (140 mg, 200-400 mesh, extent of labeling: 3.5-4.5 mmol/g Cl<sup>-</sup> loading, 1% cross-linked), NaI (84.0 mg, 0.560 mmol, 2.2 equiv), and acetone (1.5 mL, 0.17 M). The round bottom flask was capped and stirred for 24 h at room temperature. After 24 h, the mixture was passed through a short plug of silica (~5 cm in a monster pipet), eluting with diethyl ether (~20 mL), then was concentrated by rotary evaporation. The products were further purified by column chromatography (hexanes → hexanes/ethyl acetate eluent).

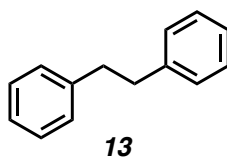

Prepared according to the general procedure from benzyltriphenylphosphonium bromide (**24**) (0.108 g, 0.25 mmol). The product was further purified by column chromatography (hexanes → 20:1 hexanes/EtOAc).

Colorless solid; Yield: 17.7 mg, 78%

All spectroscopic data were consistent with previously reported values.<sup>2</sup>

<sup>1</sup>H NMR (400 MHz, CDCl<sub>3</sub>): δ 7.31-7.27 (m, 4H), 7.22-7.19 (m, 6H), 2.93 (s, 4H).

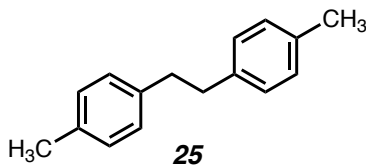

Prepared according to the general procedure from (4-methylbenzyl)triphenylphosphonium bromide (**S3**) (0.112 g, 0.25 mmol). The product was further purified by column chromatography (hexanes → 20:1 hexanes/EtOAc).

Colorless solid; Yield: 23.3 mg, 89%

All spectroscopic data were consistent with previously reported values.<sup>2</sup>

<sup>1</sup>H NMR (400 MHz, CDCl<sub>3</sub>): δ 7.10 (m, 8H), 2.87 (s, 4H), 2.33 (s, 6H).

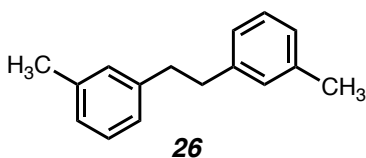

Prepared according to the general procedure from (3-methylbenzyl)triphenylphosphonium bromide (**S4**) (0.112 g, 0.25 mmol). The product was further purified by column chromatography (hexanes → 20:1 hexanes/EtOAc).

Colorless solid; Yield: 16.4 mg, 62%

All spectroscopic data were consistent with previously reported values.<sup>3</sup>

<sup>1</sup>H NMR (400 MHz, CDCl<sub>3</sub>): δ 7.20 (t, *J* = 7.6 Hz, 2H), 7.05-7.02 (m, 6H), 2.88 (s, 4H), 2.36 (s, 6H).

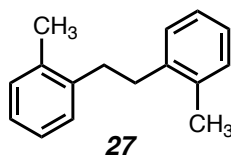

Prepared according to the general procedure from (2-methylbenzyl)triphenylphosphonium chloride (**S5**) (0.101 g, 0.25 mmol). The product was further purified by column chromatography (hexanes → 20:1 hexanes/EtOAc).

Colorless solid; Yield: 13.9 mg, 53%

All spectroscopic data were consistent with previously reported values.<sup>2</sup>

<sup>1</sup>H NMR (400 MHz, CDCl<sub>3</sub>): δ 7.19-7.11 (m, 8H), 2.86 (s, 4H), 2.33 (s, 6H).

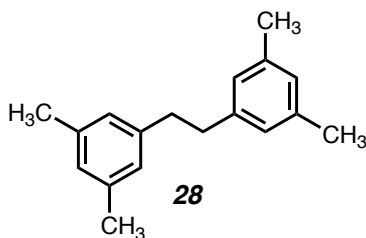

Prepared according to the general procedure from (3,5-dimethylbenzyl)triphenylphosphonium bromide (**S6**) (0.115 g, 0.25 mmol). The product was further purified by column chromatography (hexanes → 20:1 hexanes/EtOAc).

Colorless solid; Yield: 19.5 mg, 65%

All spectroscopic data were consistent with previously reported values.<sup>3</sup>

<sup>1</sup>H NMR (400 MHz, CDCl<sub>3</sub>): δ 6.86 (s, 6H), 2.82 (s, 4H), 2.32 (s, 12H).

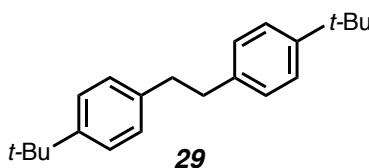

Prepared according to the general procedure from (4-*tert*-butylbenzyl)triphenylphosphonium bromide (**S7**) (0.122 g, 0.25 mmol). The product was further purified by column chromatography (hexanes → 20:1 hexanes/EtOAc).

Colorless solid; Yield: 32.2 mg, 88%

All spectroscopic data were consistent with previously reported values.<sup>2</sup>

<sup>1</sup>H NMR (400 MHz, CDCl<sub>3</sub>): δ 7.34 (d, *J* = 8.0 Hz, 4H), 7.19 (d, *J* = 8.0 Hz, 4H), 2.90 (s, 4H), 1.33 (s, 18H).

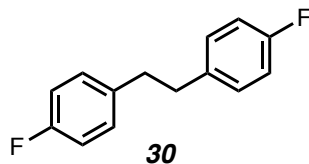

Prepared according to the general procedure from (4-fluorobenzyl)triphenylphosphonium chloride (**S8**) (0.102 g, 0.25 mmol). The product was further purified by column chromatography (hexanes → 20:1 hexanes/EtOAc).

Colorless solid; Yield: 25.6 mg, 94%

All spectroscopic data were consistent with previously reported values.<sup>2</sup>

<sup>1</sup>H NMR (400 MHz, CDCl<sub>3</sub>): δ 7.09-7.07 (m, 4H), 6.97-6.93 (m, 4H), 2.86 (s, 4H).

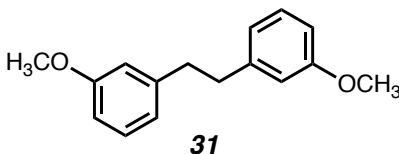

Prepared according to the general procedure from (3-methoxybenzyl)triphenylphosphonium chloride (**S9**) (0.105 g, 0.25 mmol). The product was further purified by column chromatography (hexanes → 9:1 hexanes/EtOAc).

Colorless solid; Yield: 26.2 mg, 86%

All spectroscopic data were consistent with previously reported values.<sup>4</sup>

<sup>1</sup>H NMR (400 MHz, CDCl<sub>3</sub>): δ 7.20 (t, *J* = 7.6 Hz, 2H), 6.80-6.73 (m, 6H), 3.78 (s, 6H), 2.89 (s, 4H).

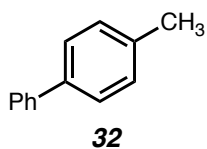

Prepared according to the general procedure from (4-phenylbenzyl)triphenylphosphonium bromide (**S10**) (0.127 g, 0.25 mmol). The product was further purified by column chromatography (hexanes → 20:1 hexanes/EtOAc).

Colorless solid; Yield: 38.2 mg, 91%

All spectroscopic data were consistent with previously reported values.<sup>5</sup>

<sup>1</sup>H NMR (400 MHz, CDCl<sub>3</sub>): δ 7.58 (d, *J* = 7.6 Hz, 2H), 7.50 (d, *J* = 8.0 Hz, 2H), 7.44 (t, *J* = 7.6 Hz, 2H), 7.33 (t, *J* = 7.6 Hz, 1H), 7.26 (d, *J* = 8.0 Hz, 2H), 2.41 (s, 3H).

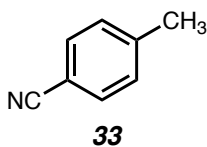

Prepared according to the general procedure from (4-cyanobenzyl)triphenylphosphonium bromide (**S11**) (0.115 g, 0.25 mmol). The product was further purified by column chromatography (hexanes → 9:1 hexanes/EtOAc).

Colorless oil; Yield: 26.9 mg, 92%

All spectroscopic data were consistent with previously reported values.<sup>6</sup>

<sup>1</sup>H NMR (400 MHz, CDCl<sub>3</sub>): δ 7.54 (d, *J* = 8.0 Hz, 2H), 7.27 (d, *J* = 8.0 Hz, 2H), 2.42 (s, 3H).

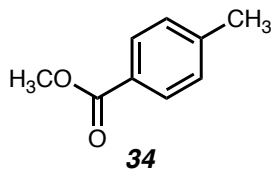

Prepared according to the general procedure from [4-(methoxycarbonyl)benzyl]triphenylphosphonium bromide (**45**) (0.123 g, 0.25 mmol). The product was further purified by column chromatography (hexanes → 9:1 hexanes/EtOAc).

Colorless oil; Yield: 32.2 mg, 86%

All spectroscopic data were consistent with previously reported values.<sup>7</sup>

<sup>1</sup>H NMR (400 MHz, CDCl<sub>3</sub>): δ 7.92 (d, *J* = 8.0 Hz, 2H), 7.23 (d, *J* = 8.0 Hz, 2H), 3.90 (s, 3H), 2.41 (s, 3H).

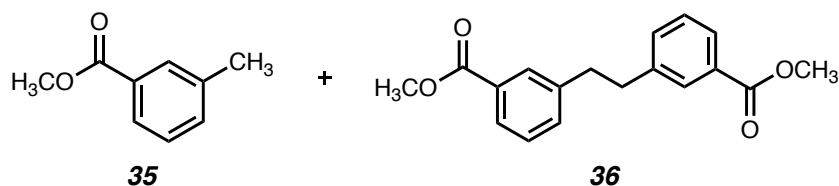

Prepared according to the general procedure for reaction optimization experiments from [3-(methoxycarbonyl)benzyl]triphenylphosphonium bromide (**S12**) (49.1 mg, 0.10 mmol). Yields were determined by <sup>1</sup>H NMR with dibromomethane as an internal standard.

**35**: 89% NMR yield. Identity confirmed by comparison with literature <sup>1</sup>H NMR spectrum.<sup>8</sup> <sup>1</sup>H NMR (400 MHz, CDCl<sub>3</sub>): δ 7.86-7.83 (m, 2H), 7.38-7.30 (m, 2H), 3.91 (s, 3H), 2.40 (s, 3H).

**36**: 5% NMR yield. Identity confirmed by comparison with literature <sup>1</sup>H NMR spectrum.<sup>9</sup>

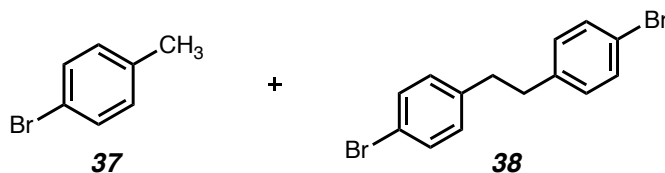

Prepared according to the general procedure for reaction optimization experiments from (4-bromobenzyl)triphenylphosphonium bromide (**S13**) (51.2 mg, 0.10 mmol). A complex mixture of products was obtained which contained 28% NMR yield of **37** and 23% NMR yield **38**, as confirmed by comparison with literature <sup>1</sup>H NMR spectra (**37**<sup>10</sup>, **38**<sup>2</sup>). Yields were determined by <sup>1</sup>H NMR with dibromomethane as an internal standard.

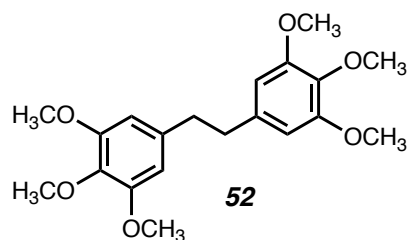

Prepared according to the general procedure from (3,4,5-trimethoxybenzyl)triphenylphosphonium chloride (**51**) (0.120 g, 0.25 mmol). The product was further purified by column chromatography (hexanes  $\rightarrow$  2:1 hexanes/EtOAc) to separate brittonin A from the minor product, 3,4,5-trimethoxytoluene (**S14**). All spectroscopic data were consistent with previously reported values.

brittonin A (**52**)<sup>4</sup>: Colorless solid; Yield: 20.0 mg, 44%

$R_f$  = 0.34 in 2:1 hexanes/EtOAc, visualized by UV

<sup>1</sup>H NMR (400 MHz, CDCl<sub>3</sub>):  $\delta$  6.36 (s, 4H), 3.82 (s, 18H), 2.84 (s, 4H).

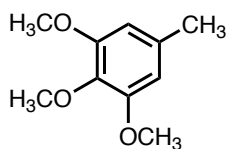

3,4,5-trimethoxytoluene (**S14**)<sup>7</sup>: 3,4,5-trimethoxytoluene: Colorless oil; Yield: 8.8 mg, 19%

$R_f$  = 0.71 in 2:1 hexanes/EtOAc, visualized by UV

<sup>1</sup>H NMR (400 MHz, CDCl<sub>3</sub>):  $\delta$  6.39 (s, 2H), 3.84 (s, 6H), 3.82 (s, 3H), 2.31 (s, 3H).

## TEMPO coupling experiment

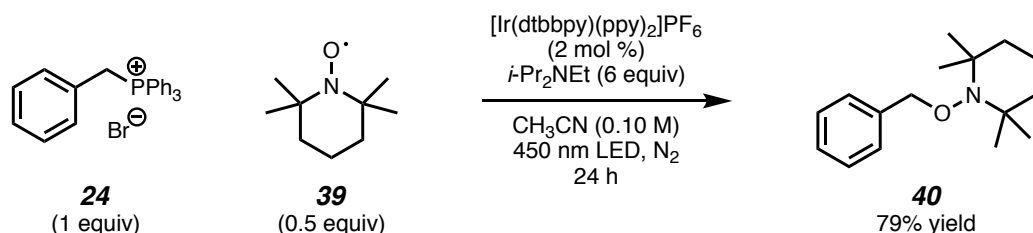

To a 1-dram vial containing a stir bar were added benzyltriphenylphosphonium bromide (**24**) (43.3 mg, 0.100 mmol, 1 equiv),  $[\text{Ir}(\text{dtbbpy})(\text{ppy})_2]\text{PF}_6$  (1.8 mg, 2.00  $\mu\text{mol}$ , 2 mol %),  $i\text{-Pr}_2\text{NEt}$  (105  $\mu\text{L}$ , 0.600 mmol, 6 equiv), TEMPO (**39**) (7.8 mg, 0.0500 mmol, 0.5 equiv), and  $\text{CH}_3\text{CN}$  (1.0 mL, 0.10 M). The vial was capped with an open-top screw cap fitted with a Teflon septum. The vial was degassed by bubbling  $\text{N}_2$  gas through the reaction mixture for 3 min. The vial was then placed on a stir plate, approximately 5 cm from the light source, and irradiated with a blue LED for 24 h with stirring. After 24 h, the reaction mixture was passed through a short plug of silica (~3 cm in a monster pipet), eluting with diethyl ether (~10 mL), then was concentrated by rotary evaporation. A solution containing 1 equiv of dibromomethane relative to TEMPO (8.7 mg, 0.0500 mmol) in  $\text{CDCl}_3$  was added and the crude reaction mixture was analyzed by  $^1\text{H}$  NMR spectroscopy.

Result: 79% NMR yield **40**. The product was identified by comparison with the literature  $^1\text{H}$  NMR spectrum.<sup>11</sup> (see crude NMR on next page)

$^1\text{H}$  NMR spectrum of crude reaction mixture with  $\text{CH}_2\text{Br}_2$  internal standard:

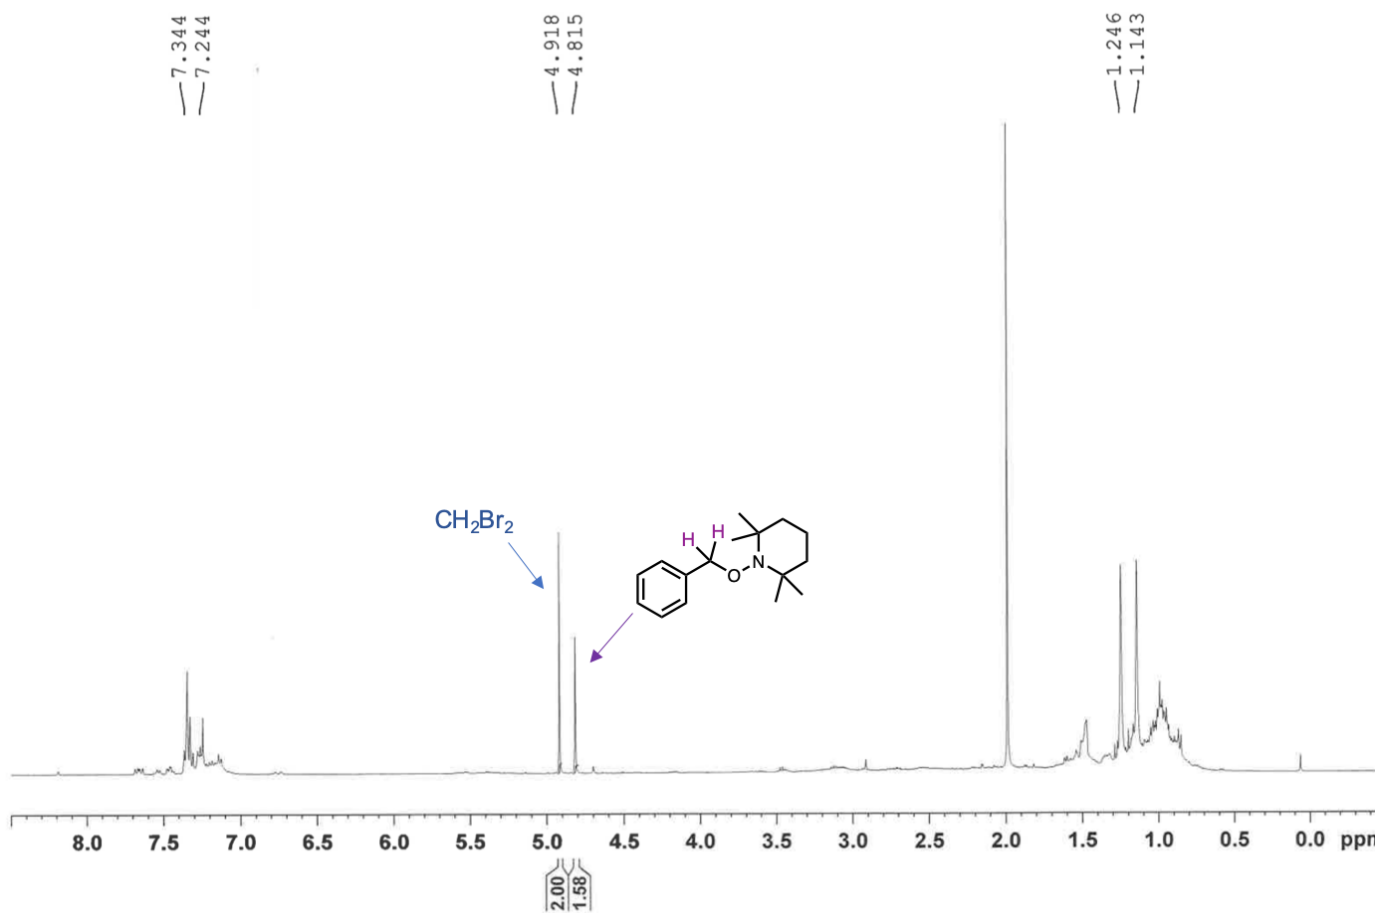



## HAT and deuterium incorporation experiments

## Scheme 6a[i]

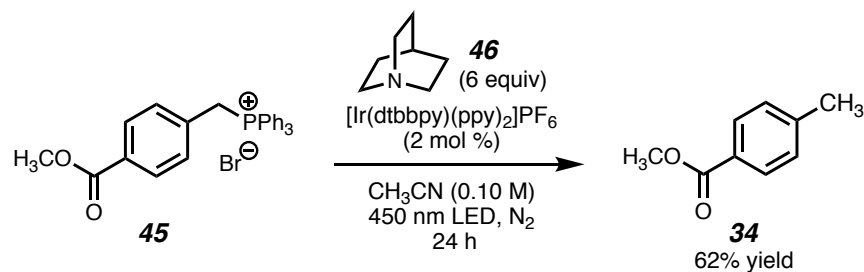

To a 1-dram vial containing a stir bar were added benzyltriphenylphosphonium salt **45** (49.1 mg, 0.100 mmol, 1 equiv),  $[\text{Ir}(\text{dtbbpy})(\text{ppy})_2]\text{PF}_6$  (1.8 mg, 2.00  $\mu\text{mol}$ , 2 mol %), quinuclidine (66.7 mg, 0.600 mmol, 6 equiv), and  $\text{CH}_3\text{CN}$  (1.0 mL, 0.10 M). The vial was capped with an open-top screw cap fitted with a Teflon septum. The vial was degassed by bubbling  $\text{N}_2$  gas through the reaction mixture for 3 min. The vial was then placed on a stir plate, approximately 5 cm from the light source, and irradiated with a blue LED for 24 h with stirring. After 24 h, the reaction mixture was passed through a short plug of silica (~3 cm in a monster pipet), eluting with diethyl ether (~10 mL), then was concentrated by rotary evaporation. A solution containing 1 equiv of dibromomethane (17.4 mg, 0.100 mmol, 1 equiv) in  $\text{CDCl}_3$  was added and the crude reaction mixture was analyzed by  $^1\text{H}$  NMR spectroscopy.

Result: 62% NMR yield **34**

## Scheme 6a[ii]

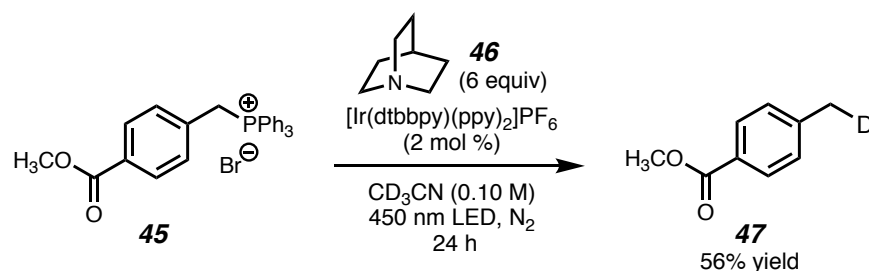

To a 1-dram vial containing a stir bar were added benzyltriphenylphosphonium salt **45** (49.1 mg, 0.100 mmol, 1 equiv),  $[\text{Ir}(\text{dtbbpy})(\text{ppy})_2]\text{PF}_6$  (1.8 mg, 2.00  $\mu\text{mol}$ , 2 mol %), quinuclidine (66.7 mg, 0.600 mmol, 6 equiv), and  $\text{CD}_3\text{CN}$  (1.0 mL, 0.10 M). The vial was capped with an open-top screw cap fitted with a Teflon septum. The vial was degassed by bubbling  $\text{N}_2$  gas through the reaction mixture for 3 min. The vial was then placed on a stir plate, approximately 5 cm from the light source, and irradiated with a blue LED for 24 h

with stirring. After 24 h, the reaction mixture was passed through a short plug of silica (~3 cm in a monster pipet), eluting with diethyl ether (~10 mL), then was concentrated by rotary evaporation. A solution containing 1 equiv of dibromomethane (17.4 mg, 0.100 mmol, 1 equiv) in  $\text{CDCl}_3$  was added and the crude reaction mixture was analyzed by  $^1\text{H}$  NMR spectroscopy.

Result: 56% NMR yield **47**. The product was identified by comparison with the literature  $^1\text{H}$  NMR spectrum.<sup>12</sup>

$^1\text{H}$  NMR spectrum of crude reaction mixture with  $\text{CH}_2\text{Br}_2$  internal standard:

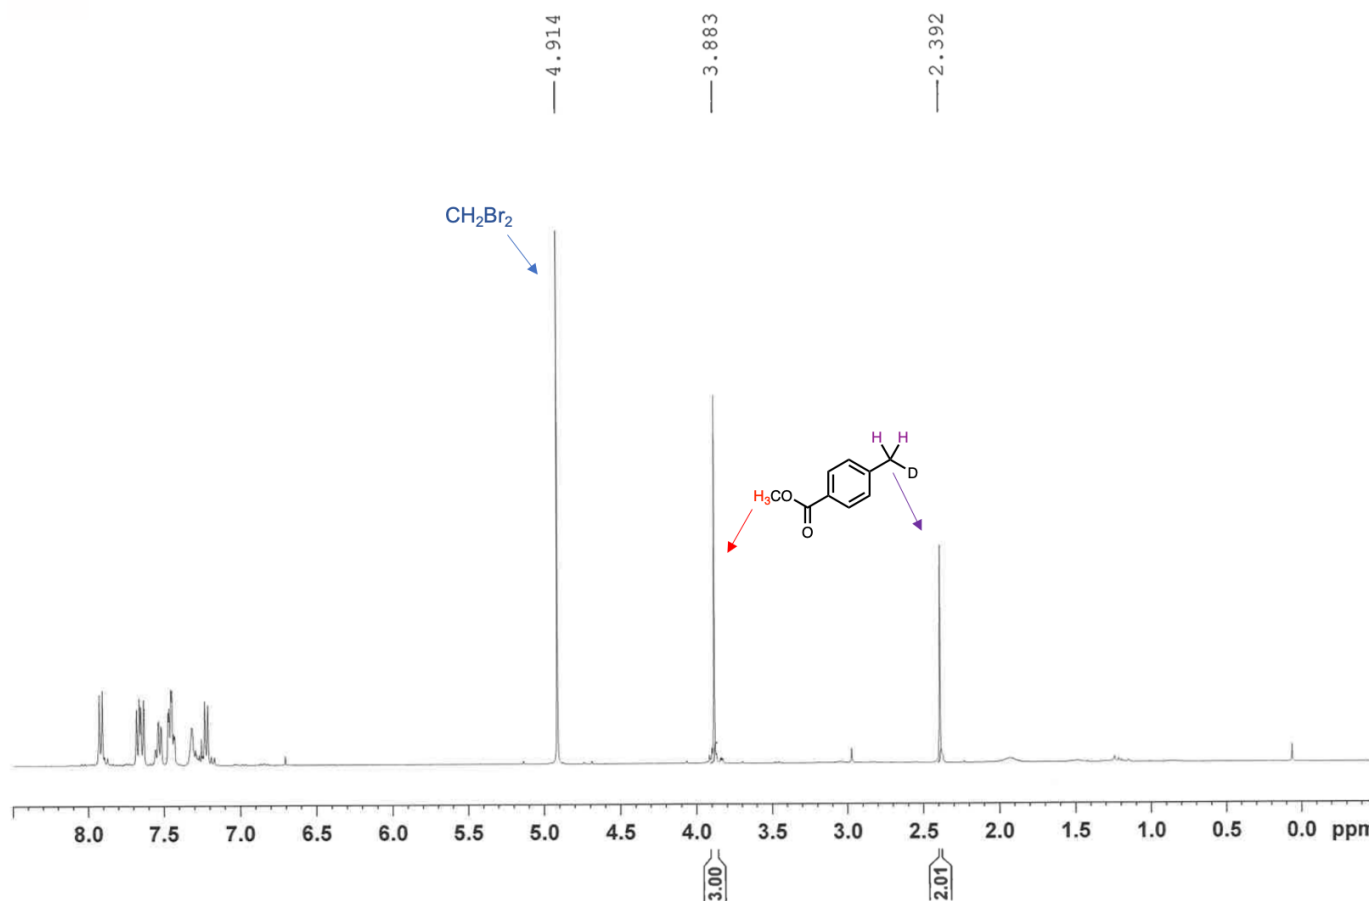

## Scheme 6b

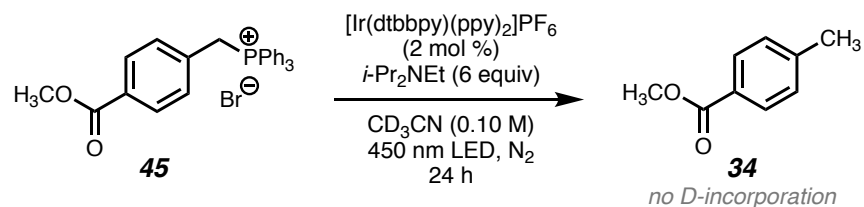

To a 1-dram vial containing a stir bar were added benzyltriphenylphosphonium salt **45** (49.1 mg, 0.100 mmol, 1 equiv),  $[\text{Ir}(\text{dtbbpy})(\text{ppy})_2]\text{PF}_6$  (1.8 mg, 2.00  $\mu\text{mol}$ , 2 mol %),  $i\text{-Pr}_2\text{NEt}$  (105  $\mu\text{L}$ , 0.600 mmol, 6 equiv), and  $\text{CD}_3\text{CN}$  (1.0 mL, 0.10 M). The vial was capped with an open-top screw cap fitted with a Teflon septum. The vial was degassed by bubbling  $\text{N}_2$  gas through the reaction mixture for 3 min. The vial was then placed on a stir plate, approximately 5 cm from the light source, and irradiated with a blue LED for 24 h with stirring. After 24 h, the reaction mixture was passed through a short plug of silica (~3 cm in a monster pipet), eluting with diethyl ether (~10 mL), then was concentrated by rotary evaporation. A solution containing 1 equiv of dibromomethane (17.4 mg, 0.100 mmol, 1 equiv) in  $\text{CDCl}_3$  was added and the crude reaction mixture was analyzed by  $^1\text{H}$  NMR spectroscopy.

Result: 90% NMR yield **34**

## Reactions of benzyl bromides

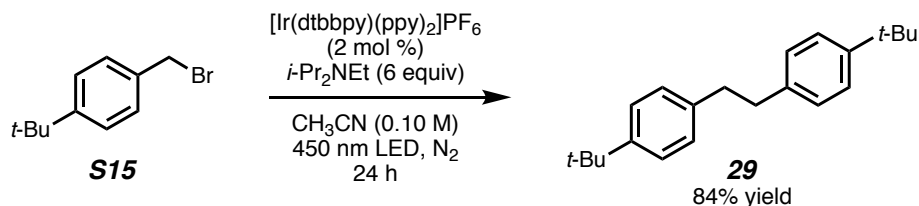

To a 1-dram vial containing a stir bar were added 4-*tert*-butylbenzyl bromide (**S15**) (22.7 mg, 0.100 mmol, 1 equiv),  $[\text{Ir}(\text{dtbbpy})(\text{ppy})_2]\text{PF}_6$  (1.8 mg, 2.00  $\mu\text{mol}$ , 2 mol %),  $i\text{-Pr}_2\text{NEt}$  (105  $\mu\text{L}$ , 0.600 mmol, 6 equiv), and  $\text{CH}_3\text{CN}$  (1.0 mL, 0.10 M). The vial was capped with an open-top screw cap fitted with a Teflon septum. The vial was degassed by bubbling  $\text{N}_2$  gas through the reaction mixture for 3 min. The vial was then placed on a stir plate, approximately 5 cm from the light source, and irradiated with a blue LED for 24 h with stirring. After 24 h, the reaction mixture was passed through a short plug of silica (~3 cm in a monster pipet), eluting with diethyl ether (~10 mL), then was concentrated by rotary evaporation. A solution containing 1 equiv of dibromomethane (17.4 mg, 0.100 mmol, 1 equiv) in  $\text{CDCl}_3$  was added and the crude reaction mixture was analyzed by  $^1\text{H}$  NMR spectroscopy.

Result: 84% NMR yield **29**

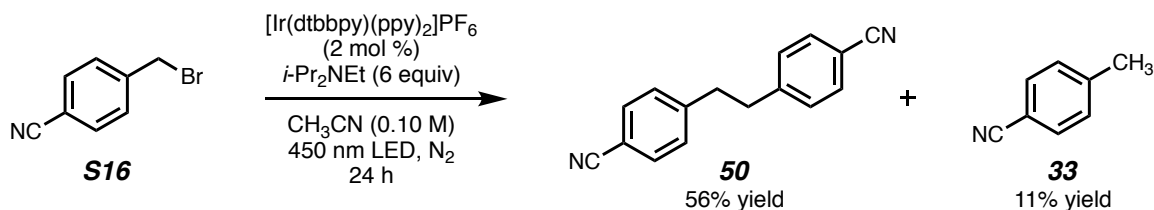

To a 1-dram vial containing a stir bar were added 4-cyanobenzyl bromide (**S16**) (19.6 mg, 0.100 mmol, 1 equiv),  $[\text{Ir}(\text{dtbbpy})(\text{ppy})_2]\text{PF}_6$  (1.8 mg, 2.00  $\mu\text{mol}$ , 2 mol %),  $i\text{-Pr}_2\text{NEt}$  (105  $\mu\text{L}$ , 0.600 mmol, 6 equiv), and  $\text{CH}_3\text{CN}$  (1.0 mL, 0.10 M). The vial was capped with an open-top screw cap fitted with a Teflon septum. The vial was degassed by bubbling  $\text{N}_2$  gas through the reaction mixture for 3 min. The vial was then placed on a stir plate, approximately 5 cm from the light source, and irradiated with a blue LED for 24 h with stirring. After 24 h, the reaction mixture was passed through a short plug of silica (~3 cm in a monster pipet), eluting with diethyl ether (~10 mL), then was concentrated by rotary evaporation. A solution containing 1 equiv of dibromomethane (17.4 mg, 0.100 mmol, 1 equiv) in  $\text{CDCl}_3$  was added and the crude reaction mixture was analyzed by  $^1\text{H}$  NMR spectroscopy.

Result: 56% NMR yield **50**,<sup>13</sup> 11% NMR yield **33**

## 1 mmol scale reaction

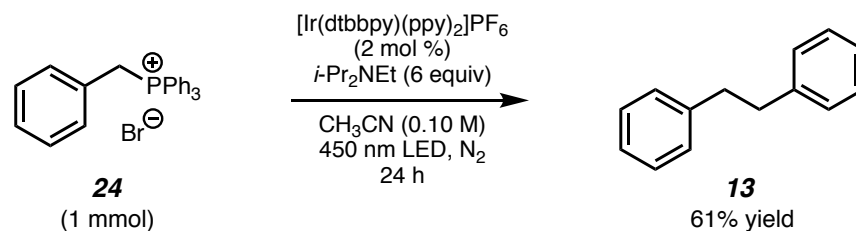

To a 50-mL round bottom flask containing a stir bar were added benzyltriphenylphosphonium bromide (**24**) (0.433 g, 1.00 mmol, 1 equiv),  $[\text{Ir}(\text{dtbbpy})(\text{ppy})_2]\text{PF}_6$  (18.3 mg, 0.0200 mmol, 2 mol %),  $i\text{-Pr}_2\text{NEt}$  (1.04 mL, 6.00 mmol, 6 equiv), and  $\text{CH}_3\text{CN}$  (10 mL, 0.10 M). The vial was sealed with a rubber septum. The flask was degassed by bubbling  $\text{N}_2$  gas through the reaction mixture for 3 min. The flask was then clamped over a stir plate, approximately 5 cm from the light source, and irradiated with a blue LED for 24 h with stirring. After 24 h, the reaction mixture was passed through a short plug of silica (~5 cm in a monster pipet), eluting with diethyl ether (~20 mL), then was concentrated by rotary evaporation.

To remove the triphenylphosphine byproduct from the crude reaction mixture, the procedure from Lipshutz was followed.<sup>1</sup> To the crude reaction mixture were added Merrifield's peptide resin (0.560 g, 200-400 mesh, extent of labeling: 3.5-4.5 mmol/g  $\text{Cl}^-$  loading, 1% cross-linked),  $\text{NaI}$  (0.336 g), and acetone (6 mL). The round bottom flask was capped and stirred for 24 h at room temperature. After 24 h, the mixture was passed through a short plug of silica (~5 cm in a monster pipet), eluting with diethyl ether (~30 mL), then was concentrated by rotary evaporation. The product was further purified by column chromatography (hexanes eluent) to yield bibenzyl (**13**) (56.0 mg, 61% yield) as a white solid.

## Representative procedure for synthesis of starting materials

To a 250-mL round bottom flask with a stir bar were added the benzyl bromide (or benzyl chloride) (6.30 mmol, 1.1 equiv), triphenylphosphine (5.70 mmol, 1 equiv), and toluene (20 mL, 0.29 M). The flask was fitted with a condenser and the reaction mixture was refluxed under N<sub>2</sub> with stirring overnight. During this time, the product precipitated out of solution. After cooling to room temperature, the reaction mixture was vacuum filtered through a fritted glass funnel to collect the triphenylphosphonium salt. The product was rinsed with toluene (20 mL) and petroleum ether (20 mL). The product was dried under vacuum for 1 h.

All spectroscopic data were consistent with previously reported values:

- benzyltriphenylphosphonium bromide (**S24**)<sup>14</sup>
- benzyltriphenylphosphonium chloride (**S1**) (purchased from Sigma-Aldrich)
- benzyltriphenylphosphonium tetrafluoroborate (**S2**)<sup>15</sup>
- (4-methylbenzyl)triphenylphosphonium bromide (**S3**)<sup>16</sup>
- (3-methylbenzyl)triphenylphosphonium bromide (**S4**)<sup>17</sup>
- (2-methylbenzyl)triphenylphosphonium chloride (**S5**)<sup>17</sup>
- (3,5-dimethylbenzyl)triphenylphosphonium bromide (**S6**)<sup>17</sup>
- (4-*tert*-butylbenzyl)triphenylphosphonium bromide (**S7**)<sup>17</sup>
- (4-fluorobenzyl)triphenylphosphonium chloride (**S8**) (purchased from Combi-blocks)
- (3-methoxybenzyl)triphenylphosphonium chloride (**S9**) (purchased from Combi-blocks)
- (4-phenylbenzyl)triphenylphosphonium bromide (**S10**):
  - <sup>1</sup>H NMR (400 MHz, CDCl<sub>3</sub>): δ 7.80-7.19 (m, 24H), 5.49 (d, *J* = 14.4 Hz, 1H).
- (4-cyanobenzyl)triphenylphosphonium bromide (**S11**)<sup>17</sup>
- [4-(methoxycarbonyl)benzyl]triphenylphosphonium bromide (**S45**)<sup>18</sup>
- [3-(methoxycarbonyl)benzyl]triphenylphosphonium bromide (**S12**):
  - <sup>1</sup>H NMR (400 MHz, CDCl<sub>3</sub>): δ 7.90-7.88 (m, 1H), 7.78-7.76 (m, 10H), 7.69-7.64 (m, 6H), 7.38 (s, 1H), 7.30-7.28 (m, 1H), 5.58 (d, *J* = 14.4 Hz, 1H), 3.80 (s, 3H).
- (4-bromobenzyl)triphenylphosphonium bromide (**S13**)<sup>17</sup>
- (3,4,5-trimethoxybenzyl)triphenylphosphonium chloride (**S51**)<sup>19</sup>

*Synthesis of benzyltriphenylphosphonium tetrafluoroborate (S2):* A solution of benzyltriphenylphosphonium bromide (**24**) (0.289 g, 0.666 mmol) in 10 mL dichloromethane was prepared. Another solution of sodium tetrafluoroborate (2.5 g, 22.8 mmol) in 50 mL water was prepared. To a separatory funnel were added the solution of **24** and 7 mL of the sodium tetrafluoroborate solution. The separatory funnel was shaken vigorously with venting for ~1 minute to mix the layers. The layers were separated. The organic layer was returned to the separatory funnel and washed two more times with 7 mL of the sodium tetrafluoroborate solution, each time shaking the layers vigorously for ~1 minute. Then the organic layer was washed with water (3 x 7 mL). The solvent was removed by rotary evaporation and the solid product (**S2**) was dried under vacuum for 1 h.

<sup>1</sup>H NMR spectra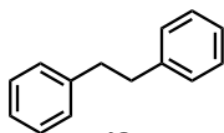

13

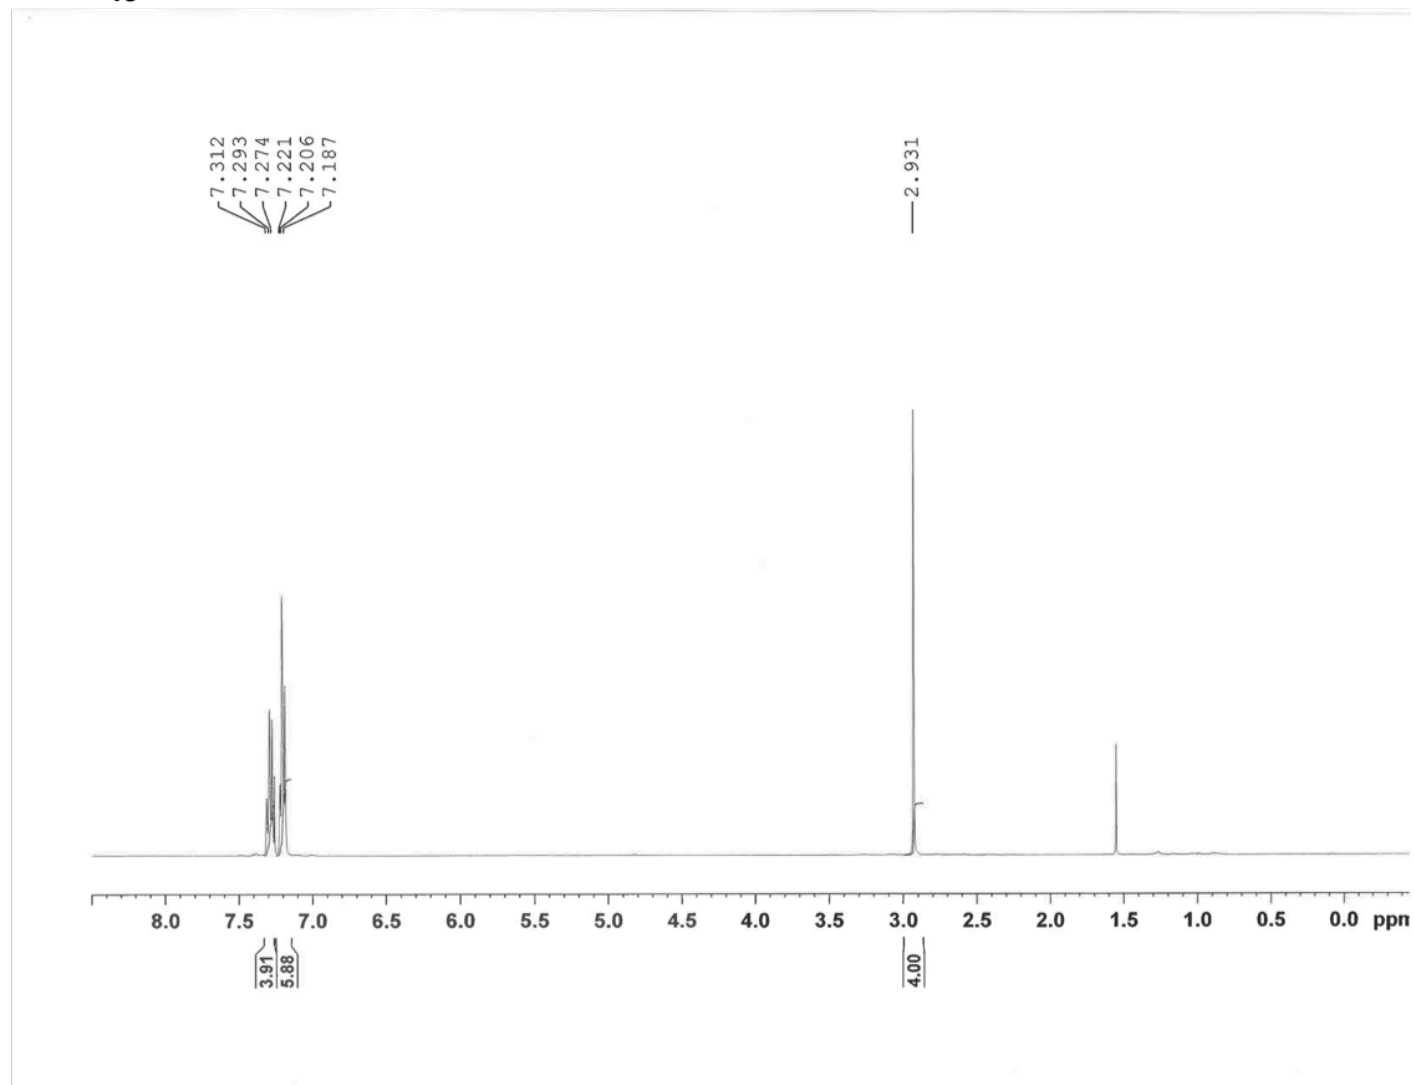



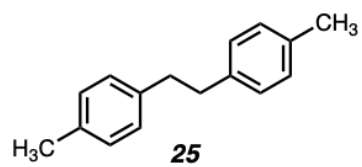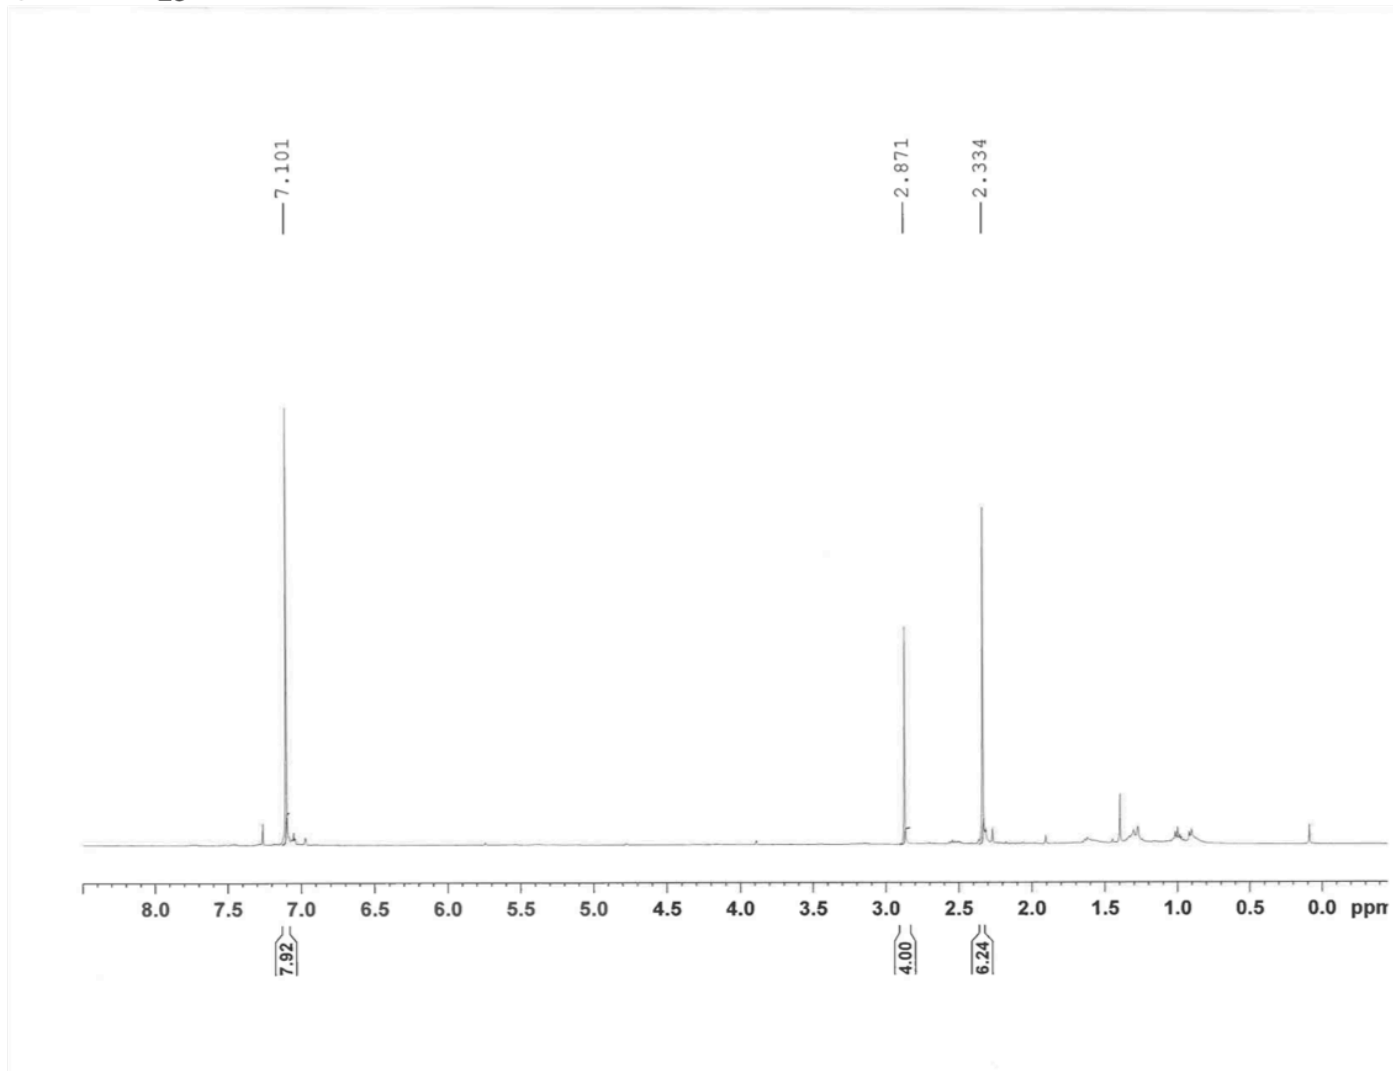

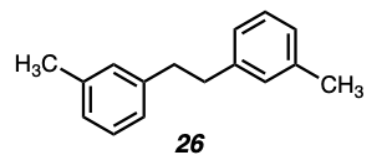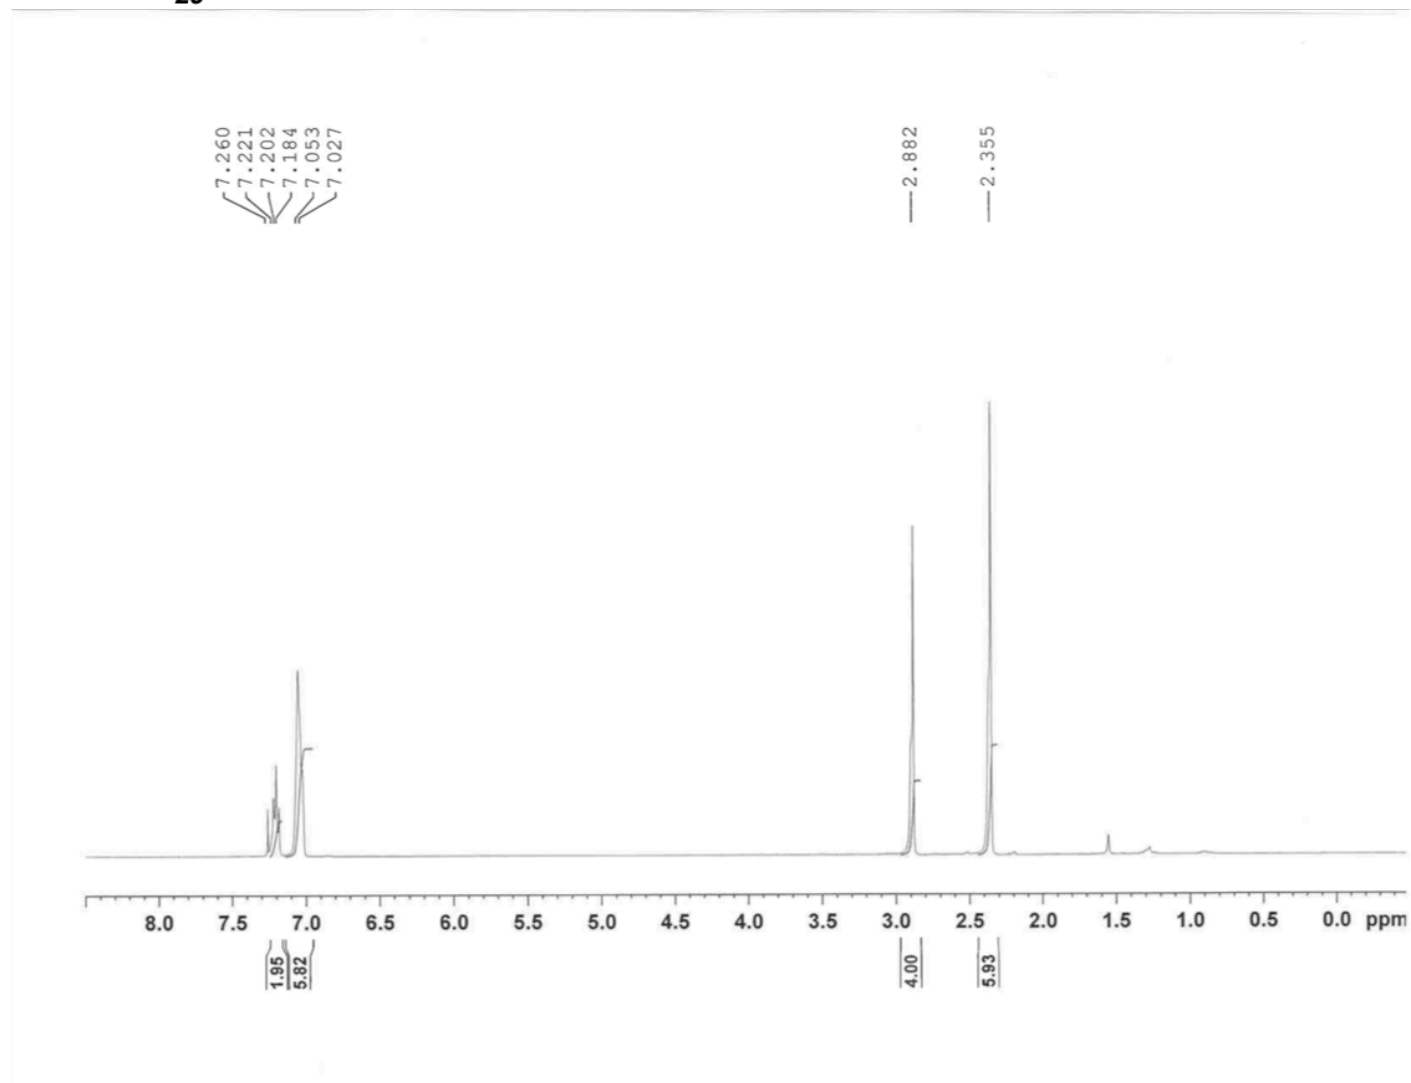

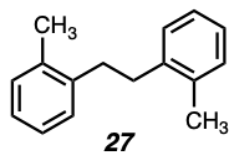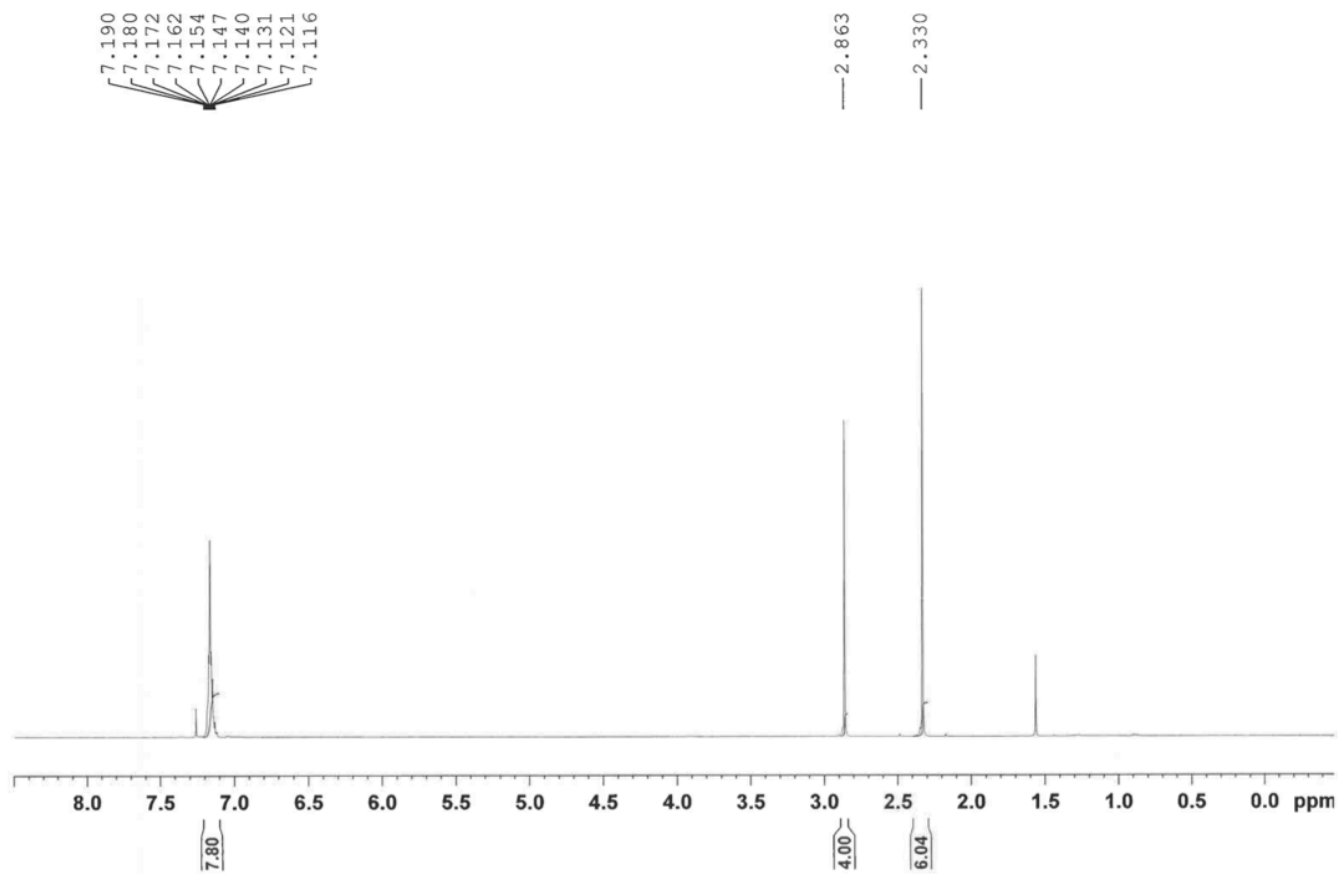

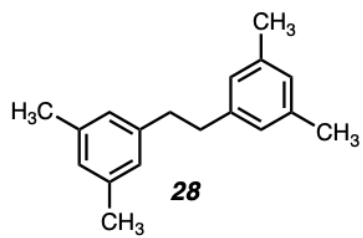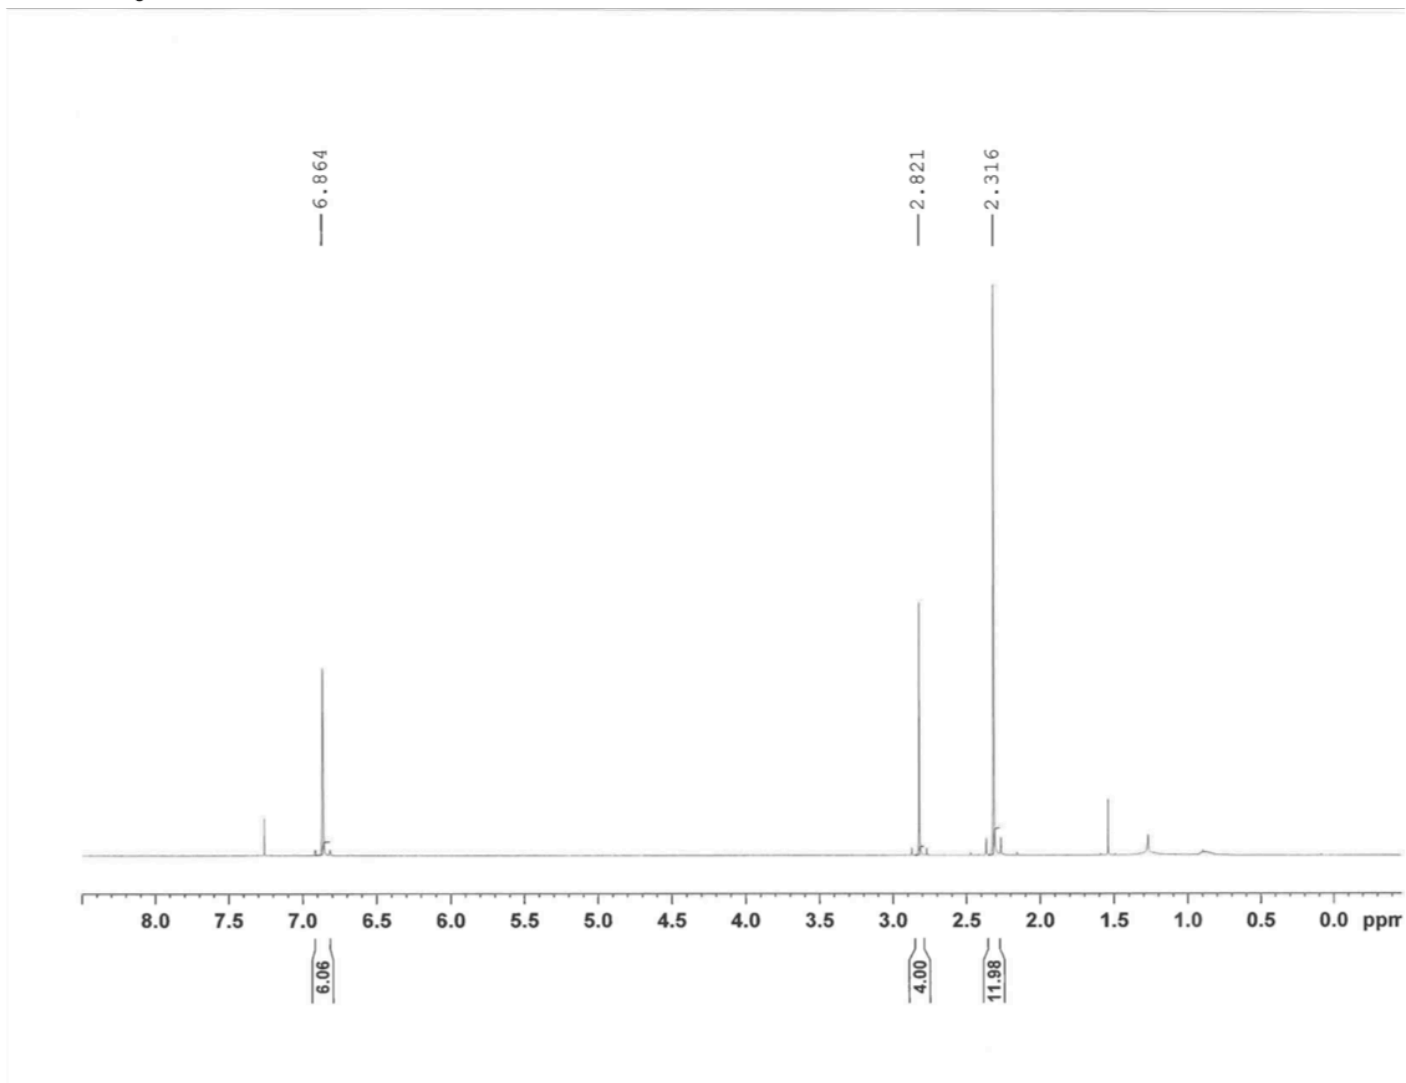

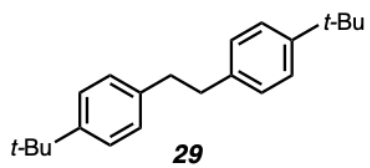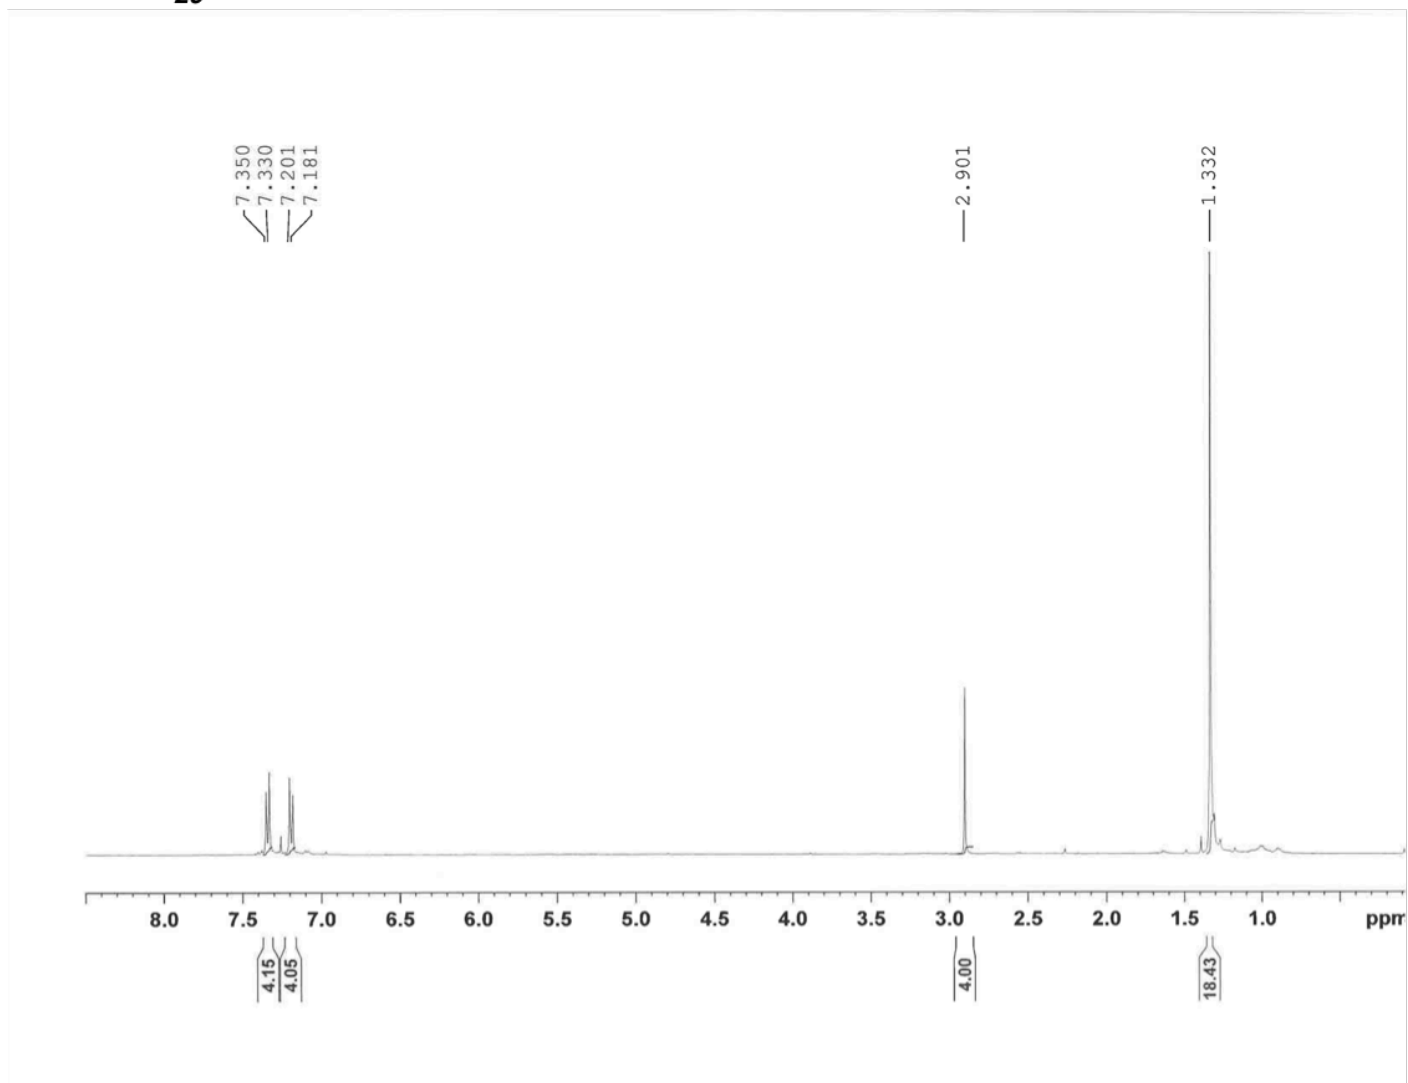

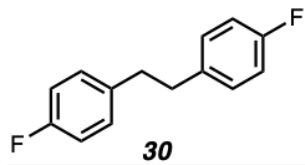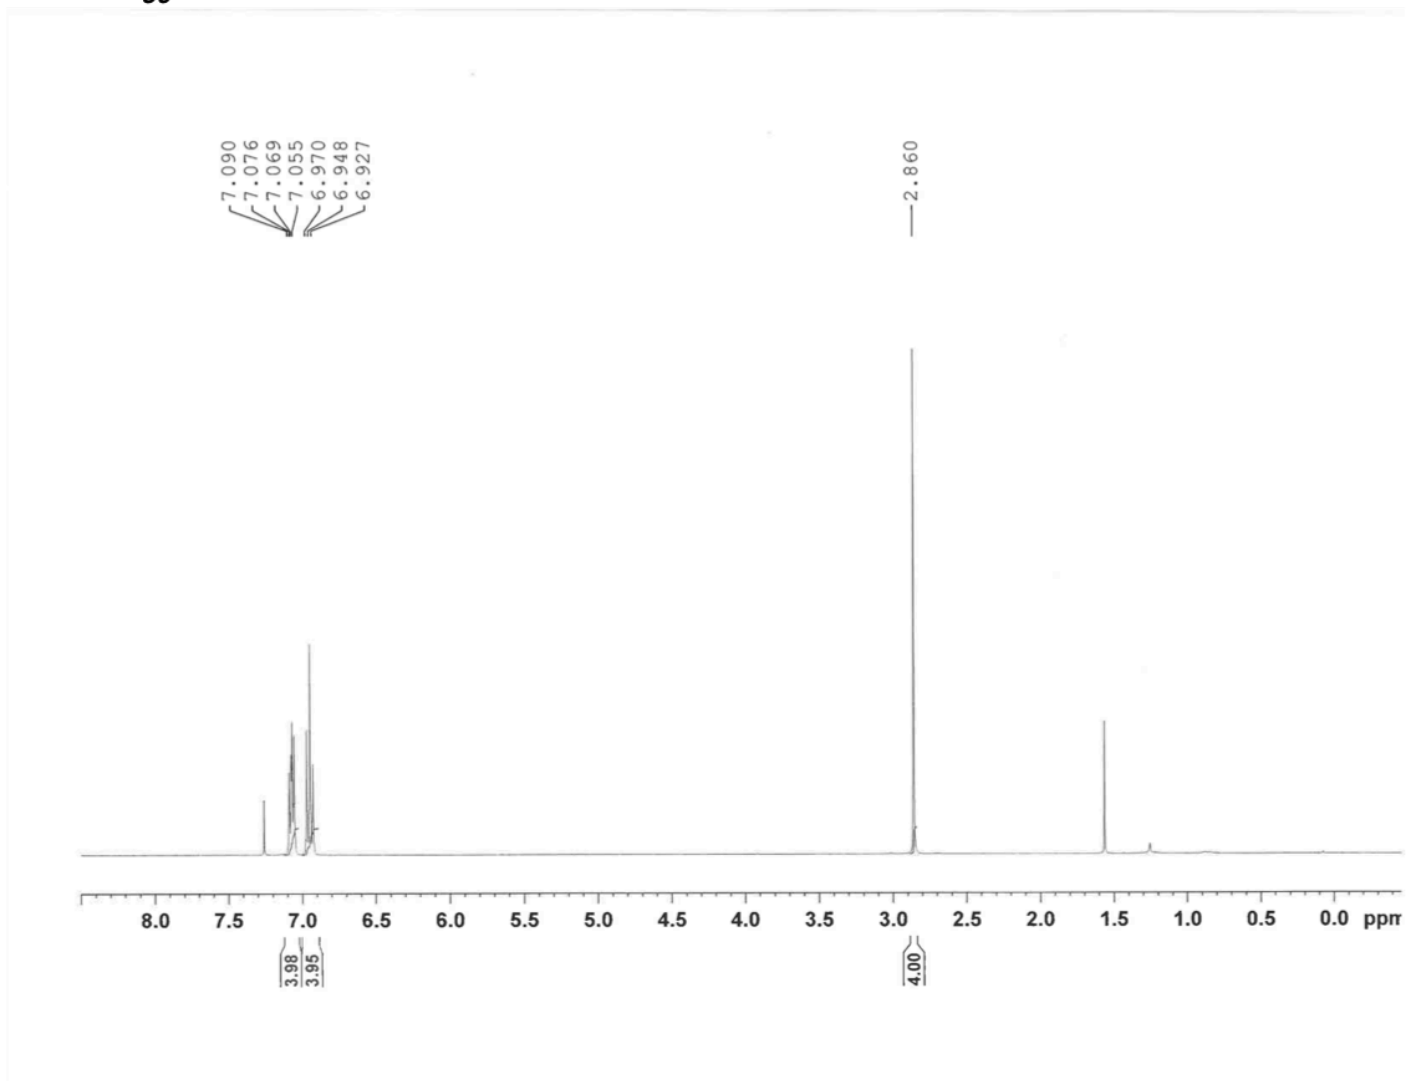

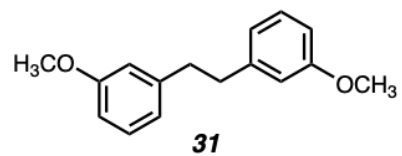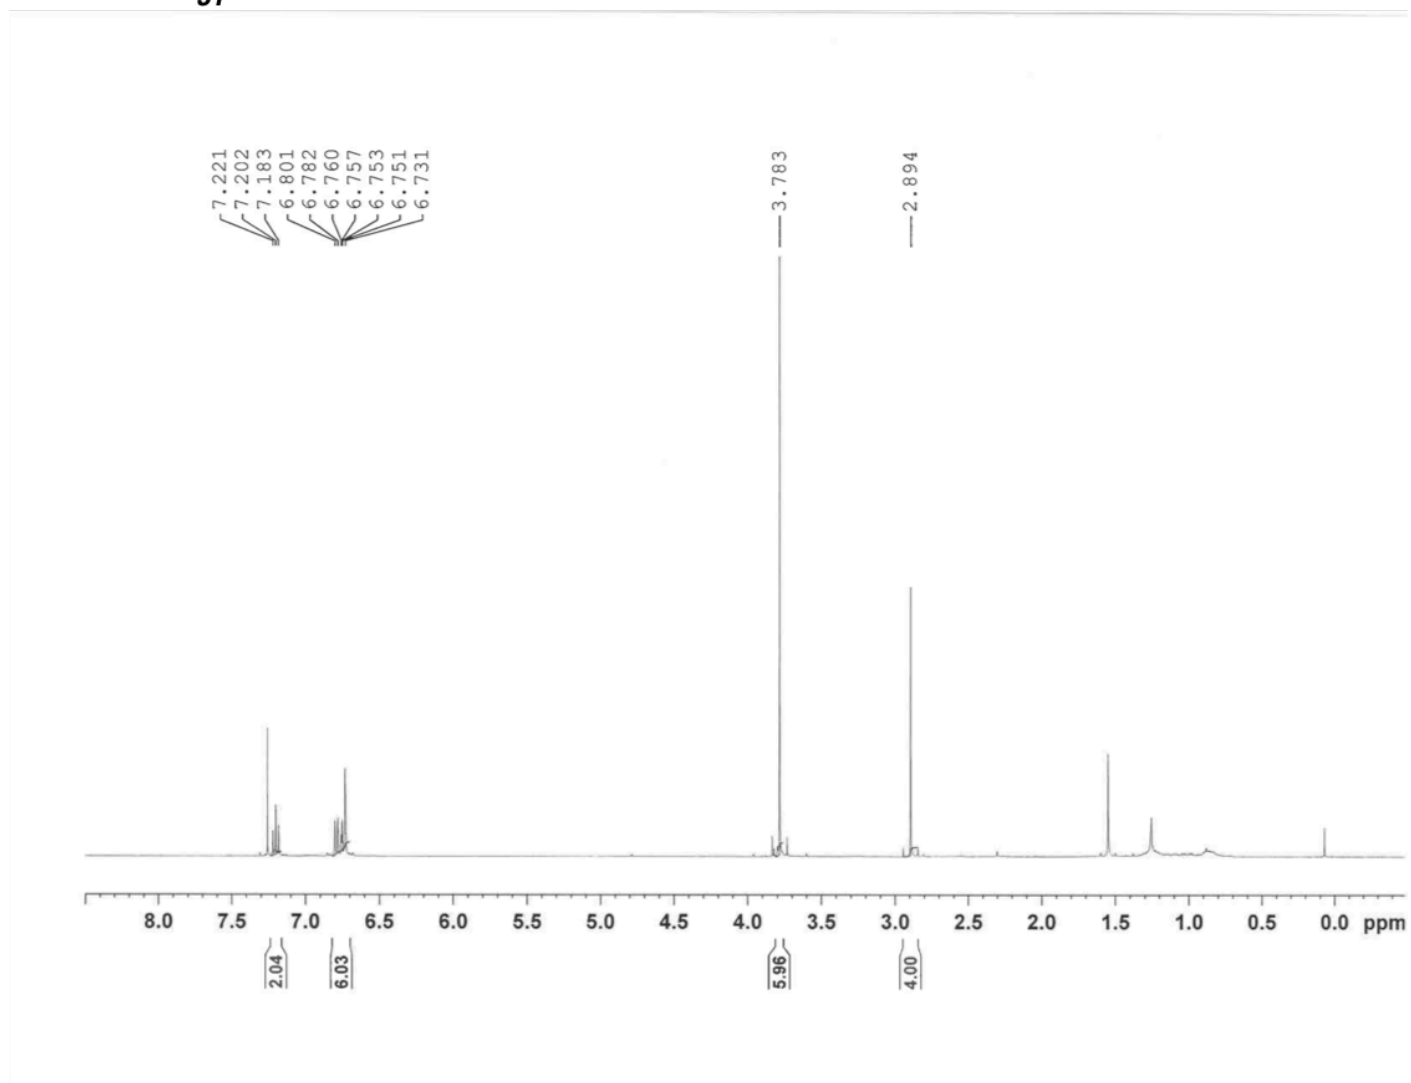

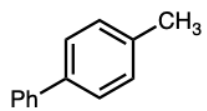**32**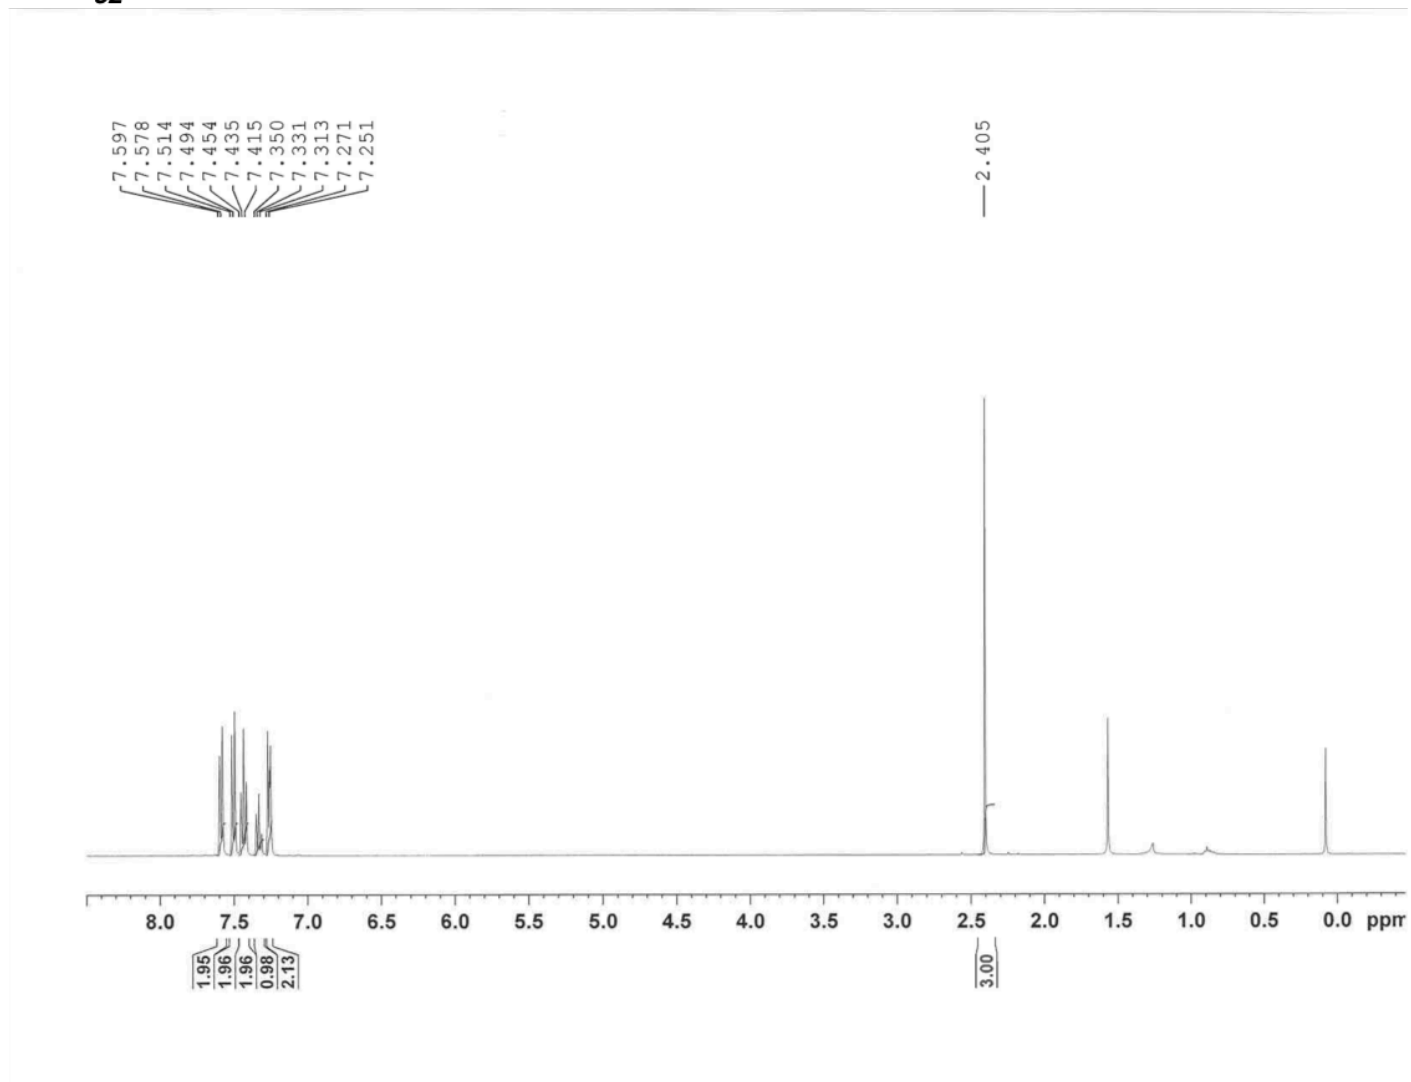



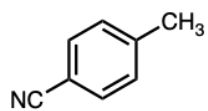**33**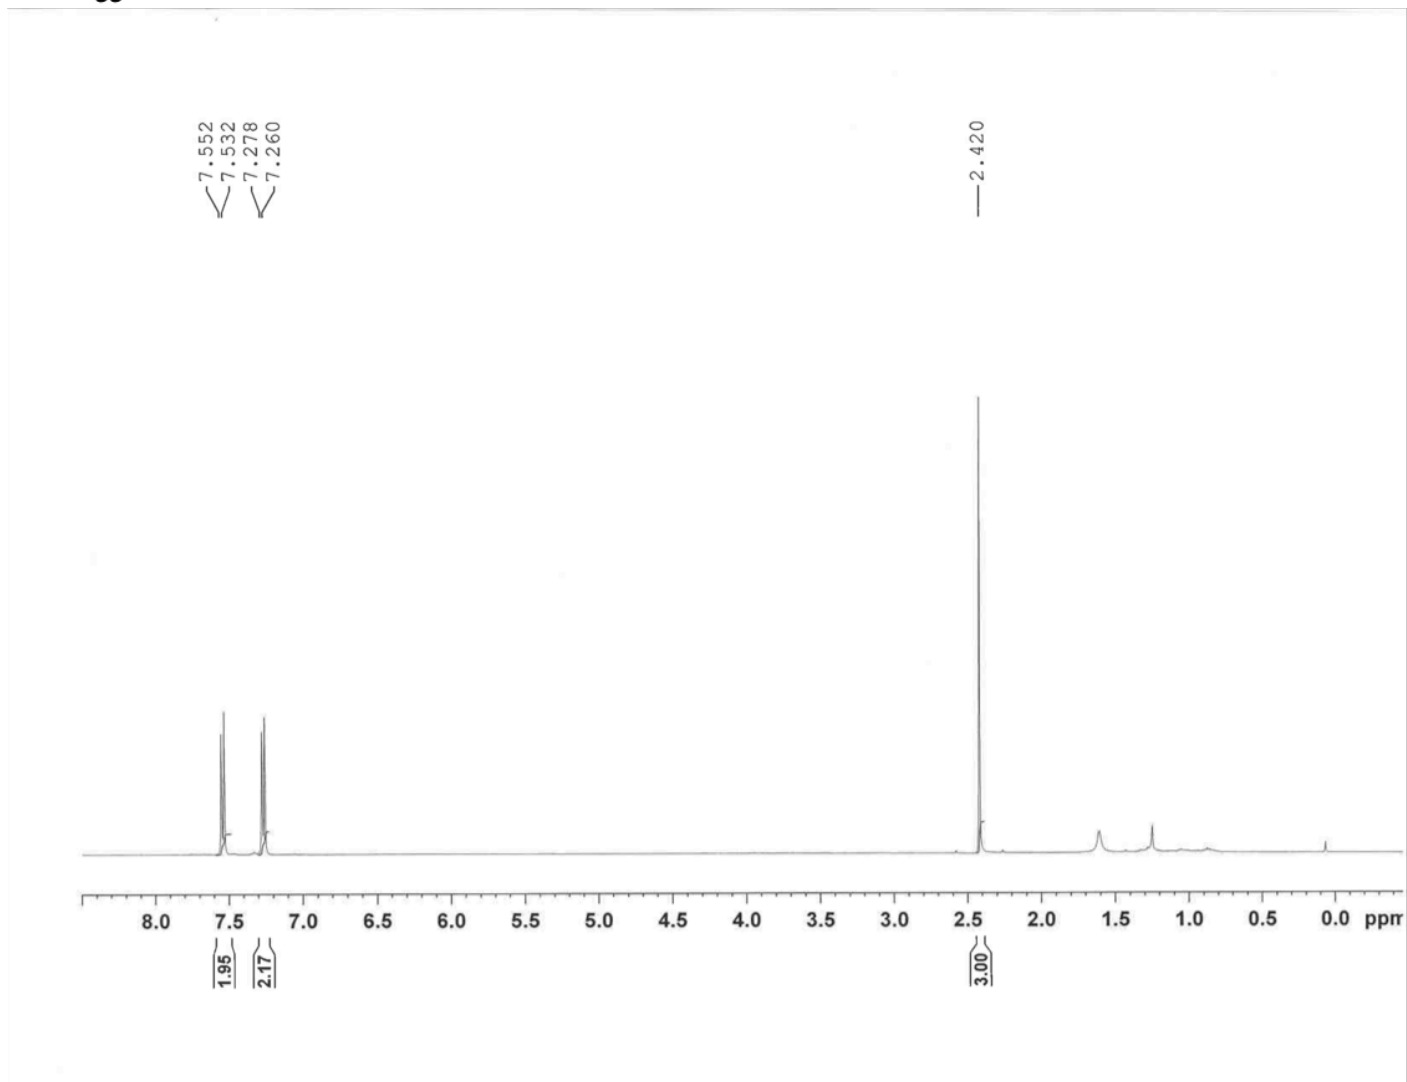

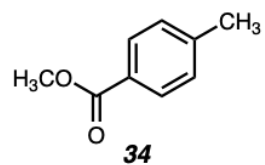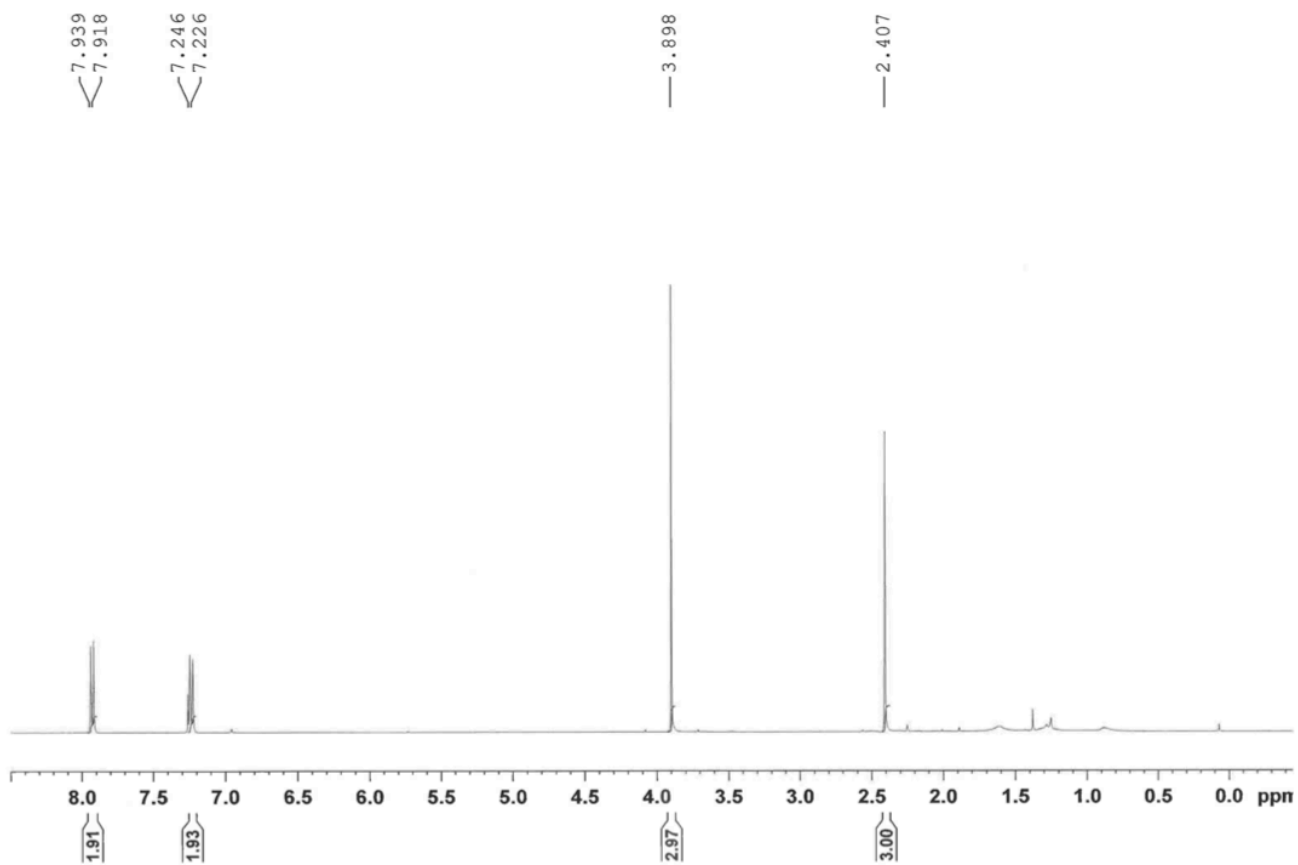

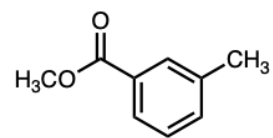**35**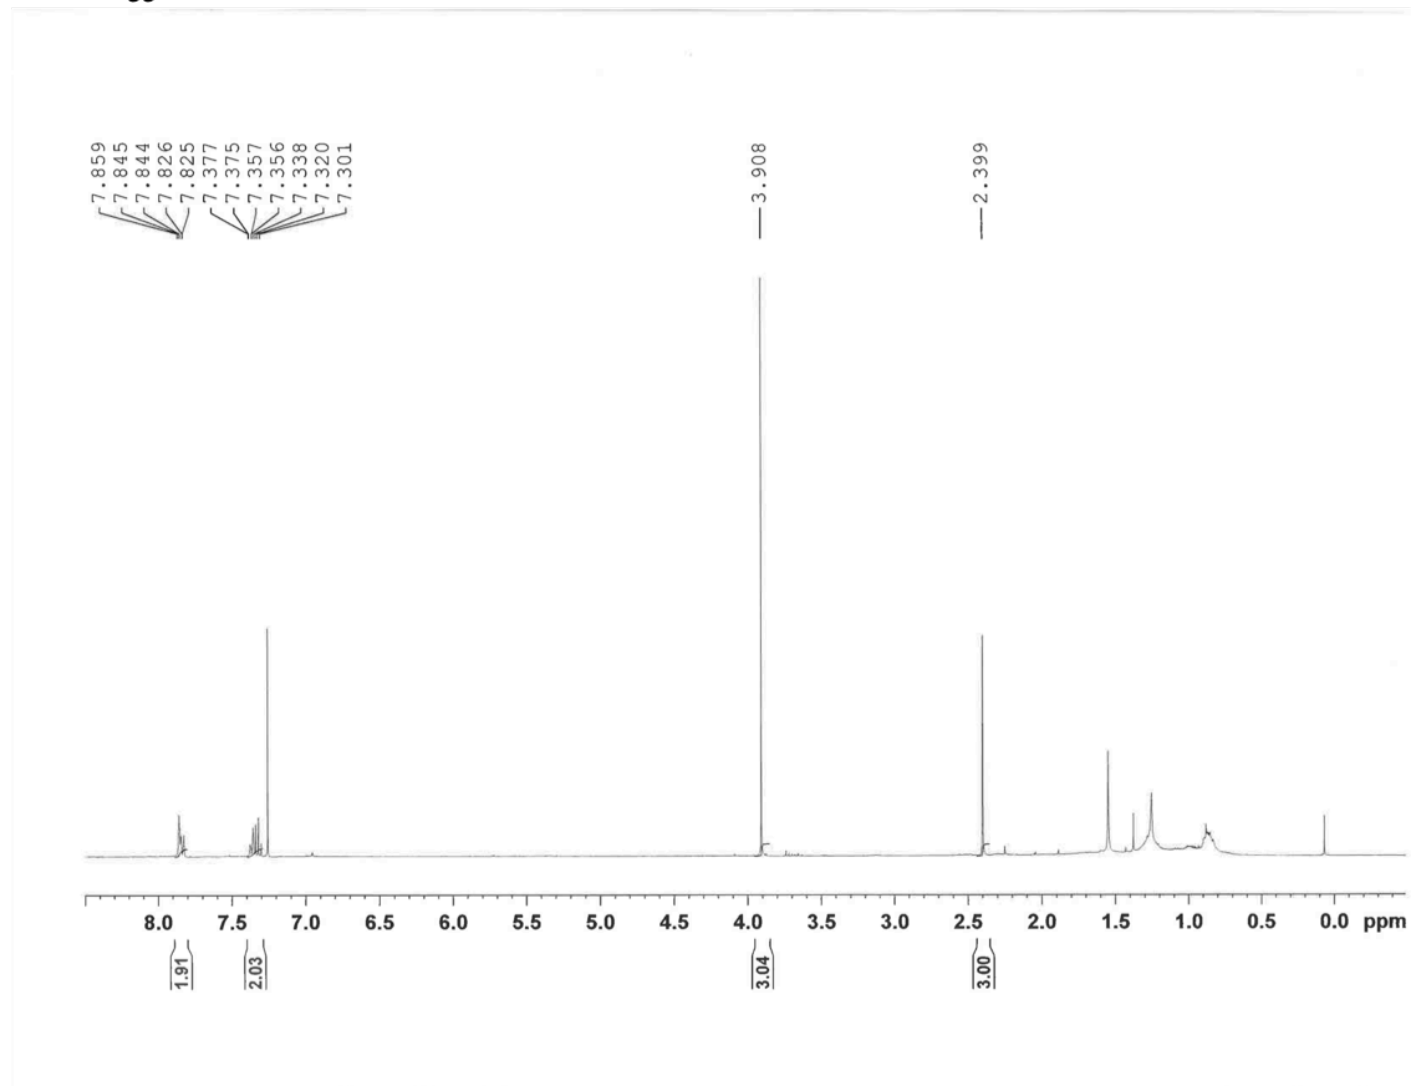

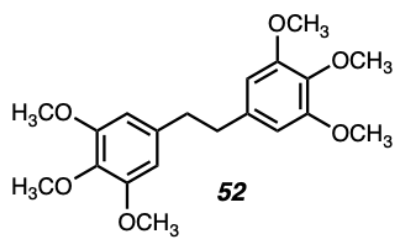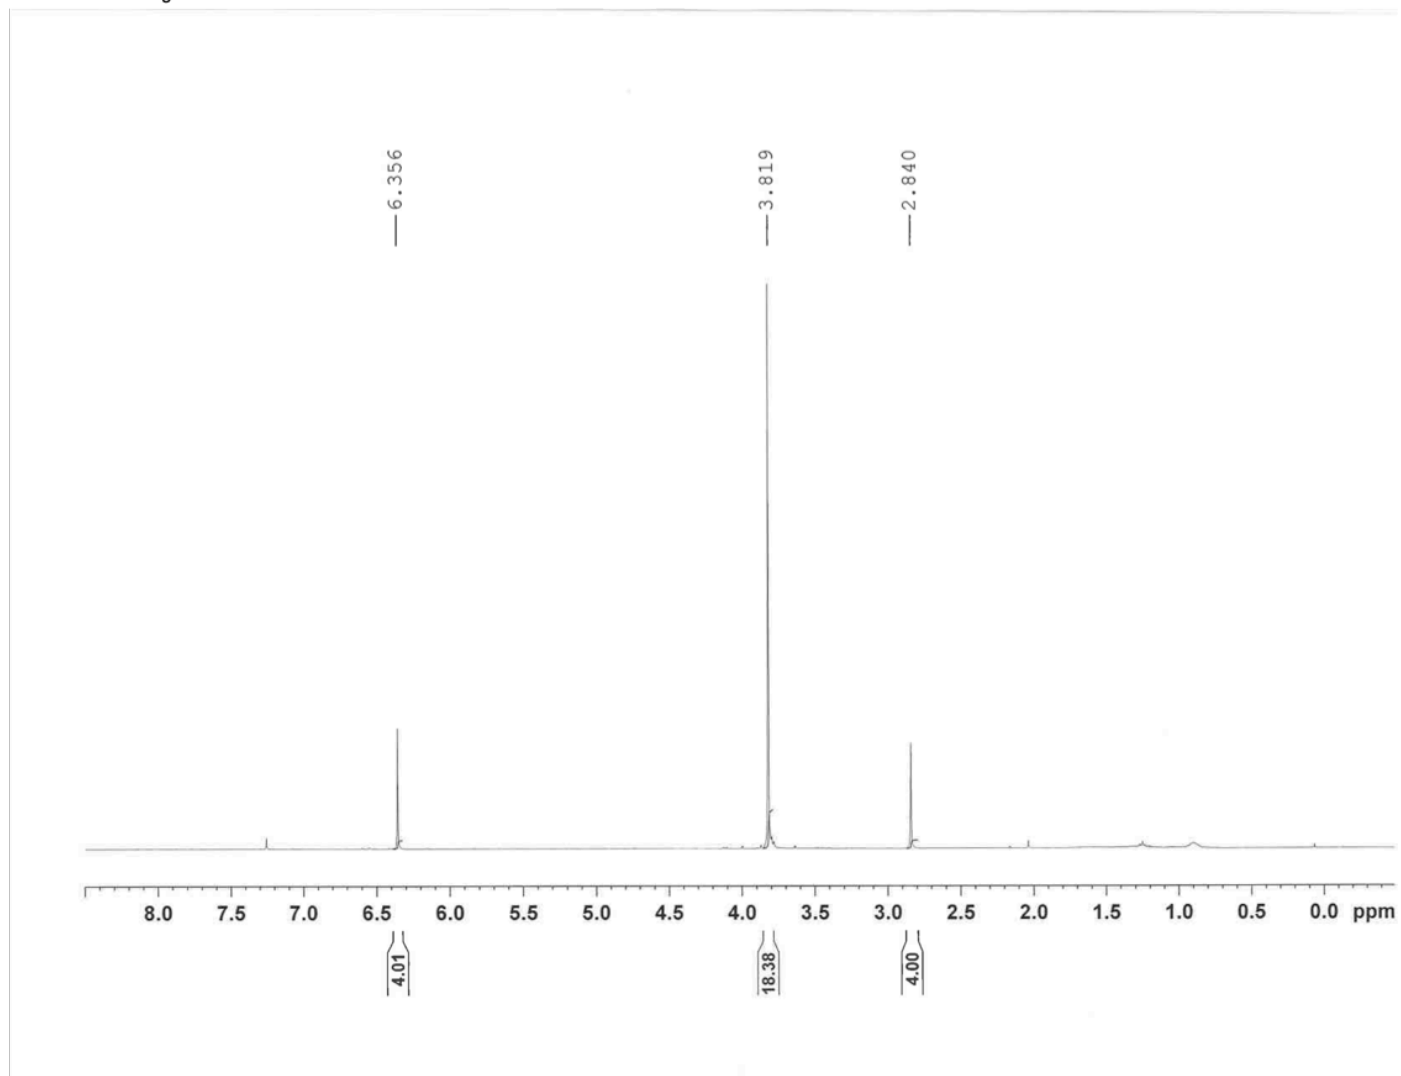

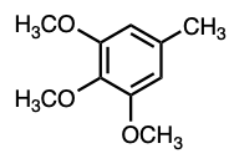**S14**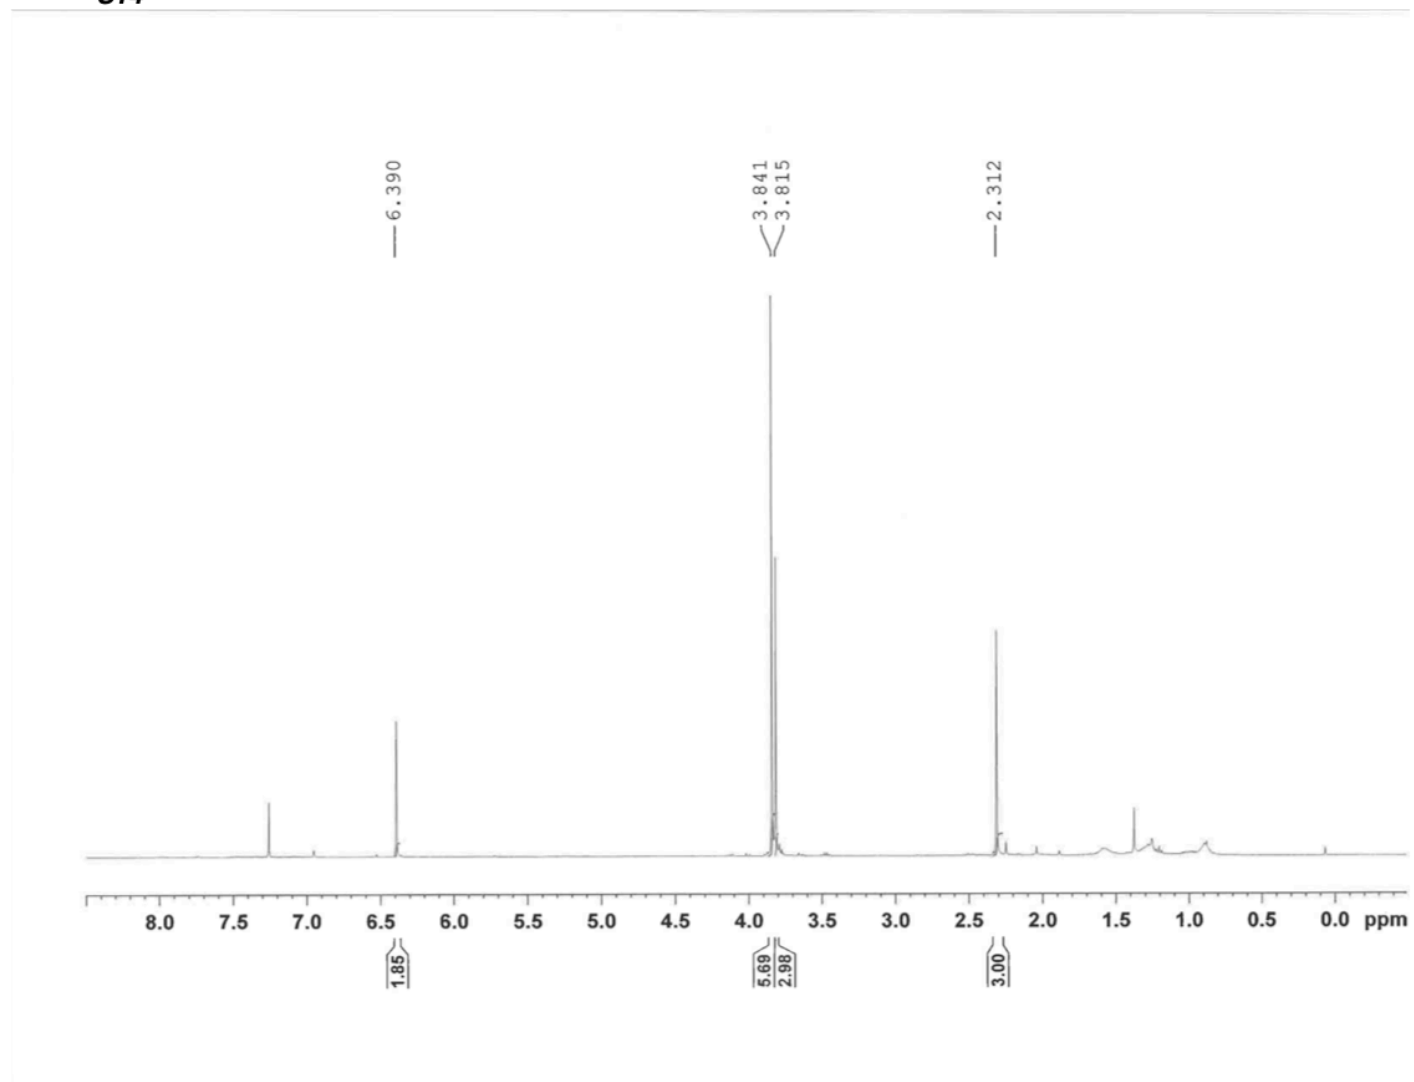

## References

---

- <sup>1</sup> B. H. Lipshutz and P. A. Blomgren, *Org. Lett.* 2001, **3**, 1869–1871.
- <sup>2</sup> K. Sato, Y. Inoue, T. Mori, A. Sakaue, A. Tarui, M. Omote, I. Kumadaki and A. Ando., *Org. Lett.*, 2014, **16**, 3756–3759.
- <sup>3</sup> M. Blangetti, P. Fleming and D. F. O'Shea, *Beilstein J. Org. Chem.*, 2011, **7**, 1249–1254.
- <sup>4</sup> G. Park, S. Y. Yi, J. Jung, E. J. Cho and Y. You, *Eur. J. Org. Chem.*, 2016, **22**, 17790–17799.
- <sup>5</sup> S. Ichii, G. Hamasaka and Y. Uozumi, *Chem. Asian J.*, 2019, **14**, 3850–3854.
- <sup>6</sup> P. Y. Yeung, C. M. So, C. P. Lau and F. Y. Kwong, *Org. Lett.*, 2011, **13**, 648–651.
- <sup>7</sup> H. R. Diéguez, A. López, V. Domingo, J. F. Arteaga, J. A. Dobado, M. M. Herrador, J. F. Quílez del Moral and A. F. Barrero, *J. Am. Chem. Soc.*, 2010, **132**, 254–259.
- <sup>8</sup> C. Liu, J. Wang, L. Meng, Y. Deng, Y. Li and A. Lei, *Angew. Chem. Int. Ed.*, 2011, **50**, 5144–5148.
- <sup>9</sup> C. D. Mboyi, S. Gaillard, M. D. Mabaye, N. Pannetier and J.-L. Renaud, *Tetrahedron*, 2013, **69**, 4875–4882.
- <sup>10</sup> C.-T. Yang, Z.-Q. Zhang, Y.-C. Liu and L. Liu, *Angew. Chem. Int. Ed.*, 2011, **50**, 3904–3907.
- <sup>11</sup> G. Sorin, R. M. Mallorquin, Y. Contie, A. Baralle, M. Malacria, J.-P. Goddard and L. Fensterbank, *Angew. Chem. Int. Ed.*, 2010, **49**, 8721–8723.
- <sup>12</sup> W. Ou, X. Xiang, R. Zou, Q. Xu, K. P. Loh and C. Su, *Angew. Chem. Int. Ed.*, 2021, **60**, 6357–6361.
- <sup>13</sup> D. Yu., W.-P. To, G. S. M. Tong, L.-L. Wu, K.-T. Chan, L. Du, D. L. Phillips, Y. Liu and C.-M. Che, *Chem. Sci.*, 2020, **11**, 6370–6382.
- <sup>14</sup> K. Coetzee, C. E. Strasser, S. Cronje and H. G. Raubenheimer, *Z Naturforsch B.*, 2009, **64b**, 1449–1457.
- <sup>15</sup> R. Mazurkiewicz, T. Gorewoda, A. Kuznik and M. Grymel, *Tetrahedron Lett.*, 2006, **47**, 4219–4220.
- <sup>16</sup> M. S. M. Pearson and D. R. Carbery, *J. Org. Chem.*, 2009, **74**, 5320–5325.
- <sup>17</sup> S. Nomura, K. Endo-Umeda, A. Aoyama, M. Makishima, Y. Hashimoto and M. Ishikawa, *ACS Med. Chem. Lett.* 2015, **6**, 902–907.
- <sup>18</sup> K. Motoshima, M. Ishikawa, Y. Hashimoto and K. Sugita, *Bioorg. Med. Chem.*, 2011, **19**, 3156–3172.
- <sup>19</sup> S. C. Dakdouki, D. Villamin and N. Bar, *Eur. J. Org. Chem.*, 2010, **2**, 333–337.
